# Supplementary material
Source: Research Square preprint supplement (doi:10.21203/rs.3.rs-8718995/v1)
Supplement: Supplementary file 1 [file 0b11bc7fe324ff01049ccf28.docx]

| Table S1 Field IDs for nutrients used in UK Biobank | | | |
| --- | --- | --- | --- |
| Field IDs | Variate | Field IDs | Variate |
| p26030 | Alcohol | p26055 | Non-milk extrinsic sugars |
| p26038 | Alpha-carotene | p26056 | Other Sugars |
| p26010 | Animal fat | p26057 | Pantothenic acid |
| p26007 | Animal protein | p26036 | Phosphorus |
| p26040 | Beta cryptoxanthin | p26024 | Potassium |
| p26039 | Beta-carotene | p26005 | Protein |
| p26041 | Biotin | p26026 | Retinol |
| p26018 | Calcium | p26035 | Riboflavin |
| p26013 | Carbohydrate | p26014 | Saturated fatty acids |
| p26042 | Chloride | p26058 | Selenium |
| p26037 | Cholesterol | p26052 | Sodium |
| p26043 | Copper | p26031 | Starch |
| p26002 | Energy | p26059 | Sucrose |
| p26004 | Energy density | p26034 | Thiamin |
| p26003 | Energy from beverages | p26027 | Total carotene |
| p26017 | Englyst fibre | p26060 | Total nitrogen |
| p26008 | Fat | p26011 | Total sugars |
| p26022 | Folate | p26000 | Total weight of all foods and beverages |
| p26012 | Free sugar | p26001 | Total weight of beverages only |
| p26044 | Fructose | p26155 | Trans fatty acids |
| p26045 | Glucose | p26009 | Vegetable fat |
| p26046 | Haem iron | p26006 | Vegetable protein |
| p26050 | Intrinsic and milk sugars | p26061 | Vitamin A retinol equivalents |
| p26047 | Iodine | p26021 | Vitamin B12 |
| p26019 | Iron | p26020 | Vitamin B6 |
| p26048 | Lactose | p26023 | Vitamin C |
| p26025 | Magnesium | p26029 | Vitamin D |
| p26049 | Maltose | p26028 | Vitamin E |
| p26051 | Manganese | p26033 | Zinc |
| p26032 | Monounsaturated fatty acids | p26015 | n-3 fatty acids |
| p26054 | Niacin equivalent | p26016 | n-6 fatty acids |
| p26053 | Non-haem iron |  |  |

| Table S2 Mortality by cause of death-UKBiobank participants | | | |
| --- | --- | --- | --- |
|  | Total deaths（N=12,617）* | | |
|  | Death by all 11 diseases | 11,765(93.2%) | |
| 1 | Certain infectious and parasitic diseases | A00-B99 | 106（0.8%） |
| 2 | Neoplasms | C00-D48 | 6,874（55%） |
| 3 | Diseases of the blood and blood-forming organs and certain disorders involving the immune mechanism | D55-D89 | 34（0.3%） |
| 4 | Endocrine, nutritional and metabolic diseases | E00-E90 | 119（0.9%） |
| 5 | Mental and behavioural disorders | F00-F89 | 228（1.8%） |
| 6 | Diseases of the nervous system | G00-G99 | 750（6.0%） |
| 7 | Diseases of the circulatory system | I05-I99 | 2,383（19%） |
| 8 | Diseases of the respiratory system | J00-J99 | 737（5.9%） |
| 9 | Diseases of the digestive system | K00-K93 | 390（3.1%） |
| 10 | Diseases of the musculoskeletal system and connective tissue | M00-M90 | 69（0.6%） |
| 11 | Diseases of the genitourinary system | N00-N98 | 75（0.6%） |

* The total number of reported deaths in UKB cohort

Table S3 The distribution of 63 nutrients

| Variable | Participants (n=208,312) | Variable | Participants (n=208,312) |
| --- | --- | --- | --- |
| Total weight of all foods and beverages (g/day) | 3135.75 (2680.41, 3650.27) | Alcohol (g/day) | 9.05 (0, 26.41) |
| Total weight of beverages only (g/day) | 1944.5 (1595, 2368.25) | Starch (g/day) | 124.41 (96.58, 154.82) |
| Energy (kal/day) | 1998.2 (1670.6, 2373.5) | Monounsaturated fatty acids (g/day) | 24.96 (18.93, 32.1) |
| Energy from beverages (kJ/day) | 1126.79 (668.76, 1739.72) | Zinc (mg/day) | 9.33 (7.49, 11.46) |
| Energy density (kJ/g per day) | 6.29 (5.32, 7.39) | Thiamin (mg/day) | 1.75 (1.38, 2.19) |
| Protein (g/day) | 78.40(65.00, 93.22) | Riboflavin (mg/day) | 1.85 (1.48, 2.24) |
| Protein (%E) | 16.2 (14.1, 18.5) | Phosphorus (mg/day) | 1390.43 (1167.37, 1634.66) |
| Vegetable protein (g/day) | 26.81 (21.4, 33.15) | Cholesterol (mg/day) | 205.74 (144.04, 302.36) |
| Animal protein (g/day) | 51.06 (39.14, 63.31) | Alpha-carotene (ug/day) | 271.06 (30.96, 794.97) |
| Fat (g/day) | 69.41 (53.35, 87.96) | Beta-carotene (ug/day) | 1899.12 (875.29, 3615.61) |
| Fat (%E) | 32.5 (28.2, 36.6) | Beta cryptoxanthin (ug/day) | 103.48 (51.67, 172.57) |
| Vegetable fat (g/day) | 29.51 (21.04, 39.86) | Biotin (ug/day) | 40.43 (32.1, 50.44) |
| Animal fat (g/day) | 37.96 (27.15, 51.04) | Chloride (mg/day) | 3205.57 (2566.35, 3979.93) |
| Total sugars (g/day) | 118.79 (91.79, 150.15) | Copper (mg/day) | 1.31 (1.05, 1.61) |
| Free sugar (g/day) | 54.38 (35.83, 77.72) | Fructose (g/day) | 26.19 (17.99, 35.74) |
| Carbohydrate (g/day) | 246.68 (201.87, 296.48) | Glucose (g/day) | 24.6 (17.47, 32.92) |
| Carbohydrate (%E) | 51.2 (46.7, 55.6) | Haem iron (mg/day) | 0.5 (0.28, 0.84) |
| Saturated fatty acids (g/day) | 25.27 (18.59, 33.26) | Iodine (ug/day) | 190.36 (145.72, 248.03) |
| n-3 fatty acids (g/day) | 1.79 (1.3, 2.44) | Lactose (g/day) | 13.19 (8.68, 18.1) |
| n-6 fatty acids (g/day) | 10.06 (7.41, 13.35) | Maltose (g/day) | 4.69 (2.95, 7.58) |
| Englyst fibre (g/day) | 17.12 (13.33, 21.34) | Intrinsic and milk sugars (g/day) | 56.79 (40.81, 74.89) |
| Calcium (mg/day) | 944.16 (750.37, 1164.59) | Manganese (mg/day) | 4.07 (3.18, 5.06) |
| Iron (mg/day) | 12 (9.77, 14.45) | Sodium (mg/day) | 1833.09 (1428.55, 2330.8) |
| Vitamin B6 (mg/day) | 1.99 (1.6, 2.43) | Non-haem iron (mg/day) | 11.39 (9.24, 13.77) |
| Vitamin B12 (ug/day) | 5.58 (4.08, 7.47) | Niacin equivalent (mg/day) | 36.94 (30.35, 44.14) |
| Folate (ug/day) | 300.61 (239.14, 370.26) | Non-milk extrinsic sugars (g/day) | 58.76 (39.71, 82.25) |
| Vitamin C (mg/day) | 115.31 (73.11, 166.33) | Other Sugars (g/day) | 1.64 (0.77, 2.94) |
| Potassium (mg/day) | 3575.91 (2957.71, 4244.63) | Pantothenic acid (mg/day) | 6.92 (5.68, 8.27) |
| Magnesium (mg/day) | 323.31 (269.46, 382.96) | Selenium (ug/day) | 47.79 (36.1, 63.08) |
| Retinol (ug/day) | 306.17 (202.59, 438.52) | Sucrose (g/day) | 42.77 (30.39, 58.56) |
| Total carotene (ug/day) | 2109.81 (950.94, 4093.59) | Total nitrogen (g/day) | 12.22 (10.15, 14.53) |
| Vitamin E (mg/day) | 10.34 (7.83, 13.3) | Vitamin A retinol equivalents (ug/day) | 732.48 (478.77, 1122.43) |
| Vitamin D (ug/day) | 2.85 (1.73, 4.62) | Trans fatty acids (g/day) | 1.08 (0.72, 1.51) |

| Table S4 Nutrients-wide association analyses of all-cause mortality by sex | | | | | | | | | |
| --- | --- | --- | --- | --- | --- | --- | --- | --- | --- |
| Nutrients | Female | | | |  | Male | | |  |
| HR | 95% CI | | *FDR-p* |  | HR | 95% CI | | *FDR-p* |
| Total weight of all foods and beverages | 1.0000 | 0.9999 | 1.0000 | 0.5740 |  | 1.0000 | 1.0000 | 1.0001 | 0.4748 |
| Total weight of beverages only | 1.0000 | 0.9999 | 1.0001 | 0.9051 |  | 1.0000 | 1.0000 | 1.0001 | 0.0545 |
| Energy | 1.0000 | 1.0000 | 1.0000 | 0.9555 |  | 1.0000 | 1.0000 | 1.0000 | 0.8684 |
| Energy from beverages | 1.0001 | 1.0000 | 1.0001 | 0.0900 |  | 1.0000 | 1.0000 | 1.0001 | 0.0101 |
| Energy density | 1.0222 | 0.9997 | 1.0451 | 0.1450 |  | 1.0154 | 0.9988 | 1.0323 | 0.1398 |
| Protein | 0.9969 | 0.9947 | 0.9990 | 0.0262 |  | 0.9996 | 0.9979 | 1.0013 | 0.7739 |
| Vegetable protein | 0.9980 | 0.9933 | 1.0027 | 0.6162 |  | 0.9935 | 0.9896 | 0.9974 | 0.0064 |
| Animal protein | 0.9977 | 0.9958 | 0.9997 | 0.0836 |  | 1.0008 | 0.9992 | 1.0024 | 0.4821 |
| Fat | 0.9995 | 0.9972 | 1.0018 | 0.7784 |  | 0.9985 | 0.9966 | 1.0003 | 0.1925 |
| Vegetable fat | 0.9993 | 0.9963 | 1.0022 | 0.7784 |  | 0.9946 | 0.9920 | 0.9971 | 0.0006 |
| Animal fat | 0.9999 | 0.9975 | 1.0024 | 0.9555 |  | 1.0017 | 0.9997 | 1.0036 | 0.1780 |
| Total sugars | 1.0011 | 1.0002 | 1.0021 | 0.0767 |  | 1.0001 | 0.9993 | 1.0008 | 0.8604 |
| Free sugar | 1.0025 | 1.0014 | 1.0037 | 0.0008 |  | 1.0017 | 1.0008 | 1.0026 | 0.0036 |
| Carbohydrate | 1.0005 | 0.9997 | 1.0014 | 0.4131 |  | 0.9994 | 0.9988 | 1.0001 | 0.1780 |
| Saturated fatty acids | 1.0033 | 0.9987 | 1.0080 | 0.3617 |  | 1.0003 | 0.9966 | 1.0040 | 0.8823 |
| n-3 fatty acids | 0.9816 | 0.9437 | 1.0210 | 0.5740 |  | 0.9437 | 0.9116 | 0.9770 | 0.0060 |
| n-6 fatty acids | 0.9911 | 0.9819 | 1.0003 | 0.1549 |  | 0.9860 | 0.9779 | 0.9942 | 0.0053 |
| Englyst fibre | 0.9923 | 0.9859 | 0.9988 | 0.0836 |  | 0.9908 | 0.9855 | 0.9961 | 0.0053 |
| Calcium | 0.9999 | 0.9997 | 1.0000 | 0.2103 |  | 0.9998 | 0.9997 | 0.9999 | 0.0020 |
| Iron | 0.9843 | 0.9705 | 0.9984 | 0.0867 |  | 0.9887 | 0.9778 | 0.9996 | 0.1015 |
| Vitamin B6 | 0.9600 | 0.8930 | 1.0320 | 0.4695 |  | 1.0080 | 0.9586 | 1.0600 | 0.8419 |
| Vitamin B12 | 0.9958 | 0.9848 | 1.0070 | 0.6612 |  | 0.9984 | 0.9899 | 1.0069 | 0.8241 |
| Folate | 0.9997 | 0.9993 | 1.0001 | 0.3035 |  | 0.9999 | 0.9996 | 1.0002 | 0.5827 |
| Vitamin C | 1.0001 | 0.9996 | 1.0005 | 0.9051 |  | 1.0001 | 0.9997 | 1.0004 | 0.8604 |
| Potassium | 0.9999 | 0.9999 | 1.0000 | 0.0262 |  | 0.9999 | 0.9999 | 1.0000 | 0.0231 |
| Magnesium | 0.9989 | 0.9983 | 0.9995 | 0.0039 |  | 0.9988 | 0.9983 | 0.9993 | <0.0001 |
| Retinol | 1.0000 | 1.0000 | 1.0000 | 0.7784 |  | 1.0000 | 1.0000 | 1.0000 | 0.5155 |
| Total carotene | 1.0000 | 1.0000 | 1.0000 | 0.9051 |  | 1.0000 | 1.0000 | 1.0000 | 0.4821 |
| Vitamin E | 0.9976 | 0.9871 | 1.0082 | 0.7784 |  | 0.9844 | 0.9755 | 0.9934 | 0.0053 |
| Vitamin D | 0.9962 | 0.9846 | 1.0080 | 0.7122 |  | 0.9898 | 0.9800 | 0.9997 | 0.1015 |
| Alcohol | 1.0000 | 0.9988 | 1.0013 | 0.9555 |  | 1.0011 | 1.0001 | 1.0020 | 0.0717 |
| Starch | 0.9993 | 0.9983 | 1.0004 | 0.4200 |  | 0.9990 | 0.9982 | 0.9998 | 0.0626 |
| Monounsaturated fatty acids | 0.9963 | 0.9910 | 1.0016 | 0.3701 |  | 0.9962 | 0.9918 | 1.0007 | 0.1804 |
| Zinc | 0.9857 | 0.9710 | 1.0007 | 0.1572 |  | 0.9951 | 0.9837 | 1.0067 | 0.5359 |
| Thiamin | 1.0203 | 0.9592 | 1.0854 | 0.7122 |  | 1.0047 | 0.9570 | 1.0547 | 0.8684 |
| Riboflavin | 0.9139 | 0.8522 | 0.9800 | 0.0559 |  | 0.9639 | 0.9108 | 1.0200 | 0.3360 |
| Phosphorus | 0.9997 | 0.9995 | 0.9998 | 0.0008 |  | 0.9998 | 0.9997 | 0.9999 | 0.0069 |
| Cholesterol | 0.9997 | 0.9995 | 1.0000 | 0.0867 |  | 1.0002 | 1.0000 | 1.0004 | 0.1356 |
| Alpha-carotene | 1.0000 | 0.9999 | 1.0000 | 0.9051 |  | 1.0000 | 0.9999 | 1.0000 | 0.6529 |
| Beta-carotene | 1.0000 | 1.0000 | 1.0000 | 0.9051 |  | 1.0000 | 1.0000 | 1.0000 | 0.4821 |
| Beta cryptoxanthin | 1.0000 | 0.9999 | 1.0001 | 0.9051 |  | 0.9999 | 0.9998 | 1.0000 | 0.4110 |
| Biotin | 0.9952 | 0.9922 | 0.9983 | 0.0189 |  | 0.9971 | 0.9949 | 0.9993 | 0.0376 |
| Chloride | 1.0000 | 1.0000 | 1.0001 | 0.6722 |  | 1.0000 | 1.0000 | 1.0001 | 0.2287 |
| Copper | 0.8976 | 0.8150 | 0.9886 | 0.0867 |  | 0.8824 | 0.8129 | 0.9579 | 0.0118 |
| Fructose | 1.0012 | 0.9987 | 1.0037 | 0.5741 |  | 0.9978 | 0.9957 | 1.0000 | 0.1107 |
| Glucose | 1.0019 | 0.9990 | 1.0048 | 0.3914 |  | 0.9985 | 0.9960 | 1.0010 | 0.3948 |
| Haem iron | 0.9969 | 0.9286 | 1.0702 | 0.9555 |  | 1.0572 | 1.0006 | 1.1170 | 0.1073 |
| Iodine | 0.9998 | 0.9994 | 1.0001 | 0.4280 |  | 1.0000 | 0.9997 | 1.0002 | 0.8419 |
| Lactose | 0.9974 | 0.9929 | 1.0019 | 0.4659 |  | 0.9954 | 0.9914 | 0.9993 | 0.0642 |
| Maltose | 1.0193 | 1.0095 | 1.0291 | 0.0015 |  | 1.0044 | 1.0005 | 1.0083 | 0.0717 |
| Intrinsic and milk sugars | 0.9996 | 0.9983 | 1.0010 | 0.7455 |  | 0.9978 | 0.9966 | 0.9989 | 0.0020 |
| Manganese | 0.9341 | 0.9059 | 0.9632 | 0.0008 |  | 0.9293 | 0.9080 | 0.9511 | <0.0001 |
| Sodium | 1.0000 | 1.0000 | 1.0001 | 0.5300 |  | 1.0001 | 1.0000 | 1.0001 | 0.0642 |
| Non-haem iron | 0.9835 | 0.9693 | 0.9980 | 0.0867 |  | 0.9855 | 0.9743 | 0.9968 | 0.0425 |
| Niacin equivalent | 0.9942 | 0.9900 | 0.9985 | 0.0418 |  | 0.9982 | 0.9948 | 1.0016 | 0.4617 |
| Non-milk extrinsic sugars | 1.0022 | 1.0010 | 1.0034 | 0.0034 |  | 1.0016 | 1.0006 | 1.0025 | 0.0053 |
| Other Sugars | 1.0050 | 0.9929 | 1.0173 | 0.6162 |  | 1.0033 | 0.9910 | 1.0157 | 0.7294 |
| Pantothenic acid | 0.9617 | 0.9401 | 0.9839 | 0.0070 |  | 0.9880 | 0.9706 | 1.0056 | 0.3087 |
| Selenium | 0.9989 | 0.9972 | 1.0005 | 0.3701 |  | 0.9995 | 0.9982 | 1.0008 | 0.5359 |
| Sucrose | 1.0028 | 1.0010 | 1.0047 | 0.0196 |  | 1.0014 | 1.0001 | 1.0026 | 0.0873 |
| Total nitrogen | 0.9835 | 0.9692 | 0.9979 | 0.0867 |  | 0.9987 | 0.9873 | 1.0102 | 0.8631 |
| Vitamin A retinol equivalents | 1.0000 | 1.0000 | 1.0000 | 0.7784 |  | 1.0000 | 1.0000 | 1.0000 | 0.8419 |
| Trans fatty acids | 1.0262 | 0.9647 | 1.0916 | 0.6162 |  | 1.0215 | 0.9703 | 1.0754 | 0.5359 |

| Table S5 Nutrients-wide association analyses of all-cause mortality | | | | | | | | | | | | | | |
| --- | --- | --- | --- | --- | --- | --- | --- | --- | --- | --- | --- | --- | --- | --- |
| Nutrients | Model 1 | | | |  | Model 2 | | | |  | Model 3 | | | |
| HR | 95% CI | | *FDR-p* |  | HR | 95% CI | | *FDR-p* |  | HR | 95% CI | | *FDR-p* |
| Total weight of all foods and beverages (g/day) | 1.0000 | 1.0000 | 1.0000 | 0.4395 |  | 1.0000 | 1.0000 | 1.0000 | 0.6026 |  | 1.0000 | 1.0000 | 1.0000 | 0.9922 |
| Total weight of beverages only (g/day) | 1.0000 | 1.0000 | 1.0000 | 0.5575 |  | 1.0001 | 1.0000 | 1.0001 | 0.0002 |  | 1.0000 | 1.0000 | 1.0001 | 0.2535 |
| Energy (kJ/day) | 1.0000 | 1.0000 | 1.0000 | 4.000E-06 |  | 1.0000 | 1.0000 | 1.0000 | 0.1005 |  | 1.0000 | 1.0000 | 1.0000 | 0.9922 |
| Energy from beverages (kJ/day) | 1.0001 | 1.0001 | 1.0001 | 1.187e-24 |  | 1.0001 | 1.0000 | 1.0001 | 4.000E-06 |  | 1.0000 | 1.0000 | 1.0001 | 0.0034 |
| Energy density (kJ/g per day) | 1.0043 | 0.9941 | 1.0146 | 0.4544 |  | 1.0490 | 1.0374 | 1.0607 | 2.032e-16 |  | 1.0170 | 1.0040 | 1.0303 | 0.0266 |
| Protein (g/day) | 0.9977 | 0.9967 | 0.9988 | 0.0001 |  | 0.9974 | 0.9963 | 0.9986 | 2.400E-05 |  | 0.9988 | 0.9975 | 1.0001 | 0.1622 |
| Vegetable protein (g/day) | 0.9926 | 0.9902 | 0.9950 | 6.089e-09 |  | 0.9913 | 0.9887 | 0.9938 | 1.310e-10 |  | 0.9954 | 0.9924 | 0.9983 | 0.0072 |
| Animal protein (g/day) | 0.9992 | 0.9983 | 1.0002 | 0.1379 |  | 0.9993 | 0.9983 | 1.0004 | 0.2259 |  | 0.9998 | 0.9986 | 1.0010 | 0.7649 |
| Fat (g/day) | 0.9973 | 0.9962 | 0.9985 | 1.700E-05 |  | 1.0002 | 0.9990 | 1.0014 | 0.7718 |  | 0.9996 | 0.9982 | 1.0010 | 0.6342 |
| Vegetable fat (g/day) | 0.9929 | 0.9913 | 0.9944 | 3.292e-18 |  | 0.9970 | 0.9954 | 0.9986 | 0.0005 |  | 0.9970 | 0.9952 | 0.9989 | 0.0072 |
| Animal fat (g/day) | 1.0016 | 1.0003 | 1.0028 | 0.0251 |  | 1.0022 | 1.0010 | 1.0035 | 0.0011 |  | 1.0015 | 1.0000 | 1.0030 | 0.1201 |
| Total sugars (g/day) | 1.0012 | 1.0007 | 1.0017 | 3.000E-06 |  | 1.0002 | 0.9997 | 1.0007 | 0.4296 |  | 1.0004 | 0.9999 | 1.0010 | 0.2153 |
| Free sugar (g/day) | 1.0024 | 1.0018 | 1.0030 | 9.297e-15 |  | 1.0031 | 1.0025 | 1.0037 | 7.861e-21 |  | 1.0019 | 1.0012 | 1.0026 | 2.000E-06 |
| Carbohydrate (g/day) | 1.0001 | 0.9997 | 1.0006 | 0.5309 |  | 0.9999 | 0.9995 | 1.0003 | 0.6510 |  | 0.9998 | 0.9993 | 1.0003 | 0.6162 |
| Saturated fatty acids (g/day) | 1.0040 | 1.0016 | 1.0064 | 0.0024 |  | 1.0050 | 1.0026 | 1.0074 | 0.0001 |  | 1.0024 | 0.9996 | 1.0052 | 0.1719 |
| n-3 fatty acids (g/day) | 0.9426 | 0.9224 | 0.9633 | 3.637e-07 |  | 0.9437 | 0.9233 | 0.9646 | 5.771e-07 |  | 0.9669 | 0.9429 | 0.9915 | 0.0242 |
| n-6 fatty acids (g/day) | 0.9724 | 0.9675 | 0.9774 | 2.073e-25 |  | 0.9866 | 0.9815 | 0.9917 | 7.319e-07 |  | 0.9902 | 0.9843 | 0.9962 | 0.0054 |
| Englyst fibre (g/day) | 0.9929 | 0.9897 | 0.9962 | 0.0001 |  | 0.9830 | 0.9795 | 0.9865 | 1.814e-20 |  | 0.9916 | 0.9876 | 0.9956 | 0.0004 |
| Calcium (mg/day) | 0.9999 | 0.9998 | 1.0000 | 0.0061 |  | 0.9998 | 0.9997 | 0.9999 | 6.985e-08 |  | 0.9998 | 0.9997 | 0.9999 | 0.0004 |
| Iron (mg/day) | 0.9897 | 0.9828 | 0.9968 | 0.0072 |  | 0.9653 | 0.9581 | 0.9726 | 2.495e-19 |  | 0.9879 | 0.9795 | 0.9964 | 0.0152 |
| Vitamin B6 (mg/day) | 1.0791 | 1.0431 | 1.1164 | 2.800E-05 |  | 0.9314 | 0.8991 | 0.9648 | 0.0001 |  | 0.9902 | 0.9511 | 1.0310 | 0.7128 |
| Vitamin B12 (ug/day) | 1.0089 | 1.0032 | 1.0145 | 0.0039 |  | 0.9938 | 0.9878 | 0.9999 | 0.0603 |  | 0.9982 | 0.9917 | 1.0048 | 0.6852 |
| Folate (ug/day) | 1.0002 | 1.0000 | 1.0004 | 0.0432 |  | 0.9993 | 0.9991 | 0.9995 | 1.723e-09 |  | 0.9998 | 0.9995 | 1.0000 | 0.1710 |
| Vitamin C (mg/day) | 0.9997 | 0.9995 | 1.0000 | 0.0449 |  | 0.9995 | 0.9992 | 0.9997 | 0.0001 |  | 1.0000 | 0.9998 | 1.0003 | 0.8021 |
| Potassium (mg/day) | 1.0000 | 1.0000 | 1.0000 | 0.8480 |  | 0.9999 | 0.9999 | 0.9999 | 1.814e-20 |  | 0.9999 | 0.9999 | 1.0000 | 0.0010 |
| Magnesium (mg/day) | 0.9987 | 0.9984 | 0.9990 | 4.324e-17 |  | 0.9977 | 0.9974 | 0.9980 | 9.348e-44 |  | 0.9989 | 0.9985 | 0.9993 | 1.248e-07 |
| Retinol (ug/day) | 1.0000 | 1.0000 | 1.0001 | 5.604e-09 |  | 1.0000 | 1.0000 | 1.0000 | 0.0280 |  | 1.0000 | 1.0000 | 1.0000 | 0.3433 |
| Total carotene (ug/day) | 1.0000 | 1.0000 | 1.0000 | 0.5309 |  | 1.0000 | 1.0000 | 1.0000 | 0.0394 |  | 1.0000 | 1.0000 | 1.0000 | 0.5637 |
| Vitamin E (mg/day) | 0.9761 | 0.9707 | 0.9815 | 1.314e-16 |  | 0.9880 | 0.9822 | 0.9937 | 0.0001 |  | 0.9915 | 0.9849 | 0.9982 | 0.0287 |
| Vitamin D (ug/day) | 1.0040 | 0.9982 | 1.0098 | 0.2246 |  | 0.9904 | 0.9841 | 0.9967 | 0.0045 |  | 0.9937 | 0.9864 | 1.0010 | 0.1719 |
| Alcohol (g/day) | 1.0006 | 1.0000 | 1.0012 | 0.0534 |  | 1.0001 | 0.9995 | 1.0007 | 0.7718 |  | 1.0006 | 0.9999 | 1.0013 | 0.1719 |
| Starch (g/day) | 0.9987 | 0.9982 | 0.9992 | 4.000E-06 |  | 0.9996 | 0.9990 | 1.0001 | 0.1754 |  | 0.9992 | 0.9985 | 0.9998 | 0.0274 |
| Monounsaturated fatty acids (g/day) | 0.9886 | 0.9858 | 0.9913 | 2.851e-15 |  | 0.9991 | 0.9962 | 1.0019 | 0.5596 |  | 0.9978 | 0.9945 | 1.0012 | 0.3068 |
| Zinc (mg/day) | 0.9942 | 0.9868 | 1.0017 | 0.1641 |  | 0.9861 | 0.9784 | 0.9939 | 0.0008 |  | 0.9929 | 0.9841 | 1.0017 | 0.1960 |
| Thiamin (mg/day) | 1.0132 | 0.9838 | 1.0435 | 0.4387 |  | 0.9536 | 0.9224 | 0.9859 | 0.0078 |  | 1.0139 | 0.9769 | 1.0524 | 0.5756 |
| Riboflavin (mg/day) | 1.0024 | 0.9681 | 1.0379 | 0.8928 |  | 0.9108 | 0.8768 | 0.9461 | 4.000E-06 |  | 0.9445 | 0.9046 | 0.9861 | 0.0246 |
| Phosphorus (mg/day) | 0.9997 | 0.9997 | 0.9998 | 3.232e-10 |  | 0.9996 | 0.9995 | 0.9997 | 5.772e-20 |  | 0.9998 | 0.9997 | 0.9999 | 2.400E-05 |
| Cholesterol (mg/day) | 1.0001 | 1.0000 | 1.0002 | 0.1996 |  | 1.0001 | 0.9999 | 1.0002 | 0.3615 |  | 1.0000 | 0.9999 | 1.0002 | 0.7283 |
| Alpha-carotene (ug/day) | 1.0000 | 1.0000 | 1.0001 | 0.0934 |  | 1.0000 | 1.0000 | 1.0000 | 0.3469 |  | 1.0000 | 1.0000 | 1.0000 | 0.4239 |
| Beta-carotene (ug/day) | 1.0000 | 1.0000 | 1.0000 | 0.5057 |  | 1.0000 | 1.0000 | 1.0000 | 0.0414 |  | 1.0000 | 1.0000 | 1.0000 | 0.5756 |
| Beta cryptoxanthin (ug/day) | 0.9999 | 0.9998 | 0.9999 | 2.700E-05 |  | 0.9999 | 0.9999 | 1.0000 | 0.0143 |  | 1.0000 | 0.9999 | 1.0001 | 0.7283 |
| Biotin (ug/day) | 0.9964 | 0.9950 | 0.9978 | 3.000E-06 |  | 0.9930 | 0.9914 | 0.9946 | 2.564e-17 |  | 0.9969 | 0.9951 | 0.9986 | 0.0029 |
| Chloride (mg/day) | 1.0000 | 1.0000 | 1.0001 | 0.0141 |  | 1.0000 | 1.0000 | 1.0001 | 0.0009 |  | 1.0000 | 1.0000 | 1.0001 | 0.0795 |
| Copper (mg/day) | 0.9192 | 0.8711 | 0.9700 | 0.0039 |  | 0.8049 | 0.7582 | 0.8544 | 4.457e-12 |  | 0.8985 | 0.8455 | 0.9547 | 0.0031 |
| Fructose (g/day) | 0.9978 | 0.9965 | 0.9992 | 0.0029 |  | 0.9949 | 0.9934 | 0.9963 | 8.516e-12 |  | 0.9991 | 0.9975 | 1.0007 | 0.3643 |
| Glucose (g/day) | 0.9992 | 0.9976 | 1.0007 | 0.3504 |  | 0.9956 | 0.9940 | 0.9973 | 5.711e-07 |  | 0.9998 | 0.9979 | 1.0017 | 0.8533 |
| Haem iron (mg/day) | 1.0679 | 1.0305 | 1.1066 | 0.0006 |  | 1.0475 | 1.0093 | 1.0871 | 0.0201 |  | 1.0365 | 0.9938 | 1.0809 | 0.1719 |
| Iodine (ug/day) | 1.0003 | 1.0001 | 1.0005 | 0.0048 |  | 0.9997 | 0.9995 | 0.9999 | 0.0044 |  | 0.9999 | 0.9997 | 1.0001 | 0.4982 |
| Lactose (g/day) | 1.0011 | 0.9987 | 1.0035 | 0.4211 |  | 0.9964 | 0.9939 | 0.9990 | 0.0080 |  | 0.9961 | 0.9932 | 0.9990 | 0.0242 |
| Maltose (g/day) | 1.0162 | 1.0135 | 1.0189 | 1.578e-30 |  | 1.0113 | 1.0083 | 1.0143 | 4.426e-13 |  | 1.0056 | 1.0021 | 1.0092 | 0.0065 |
| Intrinsic and milk sugars (g/day) | 0.9992 | 0.9985 | 0.9999 | 0.0441 |  | 0.9969 | 0.9961 | 0.9976 | 3.155e-15 |  | 0.9985 | 0.9976 | 0.9993 | 0.0031 |
| Manganese (mg/day) | 0.9255 | 0.9120 | 0.9392 | 8.355e-24 |  | 0.8894 | 0.8756 | 0.9034 | 5.539e-47 |  | 0.9322 | 0.9154 | 0.9493 | 2.132e-12 |
| Sodium (mg/day) | 1.0001 | 1.0000 | 1.0001 | 0.0002 |  | 1.0001 | 1.0001 | 1.0001 | 9.322e-09 |  | 1.0001 | 1.0000 | 1.0001 | 0.0084 |
| Non-haem iron (mg/day) | 0.9860 | 0.9789 | 0.9932 | 0.0003 |  | 0.9615 | 0.9541 | 0.9689 | 4.578e-22 |  | 0.9855 | 0.9769 | 0.9942 | 0.0052 |
| Niacin equivalent (mg/day) | 0.9948 | 0.9927 | 0.9968 | 3.000E-06 |  | 0.9927 | 0.9905 | 0.9950 | 8.015e-10 |  | 0.9971 | 0.9945 | 0.9996 | 0.0568 |
| Non-milk extrinsic sugars (g/day) | 1.0024 | 1.0018 | 1.0030 | 2.799e-14 |  | 1.0027 | 1.0021 | 1.0034 | 8.013e-16 |  | 1.0018 | 1.0010 | 1.0025 | 2.200E-05 |
| Other Sugars (g/day) | 0.9937 | 0.9864 | 1.0011 | 0.1279 |  | 1.0081 | 1.0010 | 1.0152 | 0.0340 |  | 1.0047 | 0.9964 | 1.0131 | 0.3643 |
| Pantothenic acid (mg/day) | 1.0057 | 0.9945 | 1.0169 | 0.3819 |  | 0.9604 | 0.9491 | 0.9718 | 7.985e-11 |  | 0.9788 | 0.9655 | 0.9923 | 0.0072 |
| Selenium (ug/day) | 0.9975 | 0.9967 | 0.9984 | 2.896e-08 |  | 0.9979 | 0.9971 | 0.9988 | 8.000E-06 |  | 0.9994 | 0.9984 | 1.0004 | 0.3433 |
| Sucrose (g/day) | 1.0037 | 1.0028 | 1.0045 | 3.497e-15 |  | 1.0037 | 1.0028 | 1.0046 | 4.916e-15 |  | 1.0018 | 1.0008 | 1.0028 | 0.0034 |
| Total nitrogen (g/day) | 0.9899 | 0.9828 | 0.9972 | 0.0105 |  | 0.9859 | 0.9783 | 0.9935 | 0.0005 |  | 0.9947 | 0.9860 | 1.0035 | 0.3433 |
| Vitamin A retinol equivalents (ug/day) | 1.0000 | 1.0000 | 1.0001 | 4.000E-06 |  | 1.0000 | 1.0000 | 1.0000 | 0.3684 |  | 1.0000 | 1.0000 | 1.0000 | 0.6342 |
| Trans fatty acids (g/day) | 1.0325 | 0.9993 | 1.0669 | 0.0776 |  | 1.0299 | 0.9965 | 1.0644 | 0.0983 |  | 1.0277 | 0.9892 | 1.0677 | 0.2543 |

| Table S6 Nutrients-wide association analyses of disease specific mortality | | | | | |
| --- | --- | --- | --- | --- | --- |
| Cause of death | Nutrient | HR | 95% CI | | FDR-p |
| Certain infectious and parasitic diseases | Total weight of all foods and beverages | 1.0001 | 0.9998 | 1.0004 | 0.8855 |
| Certain infectious and parasitic diseases | Total weight of beverages only | 1.0002 | 0.9999 | 1.0005 | 0.7531 |
| Certain infectious and parasitic diseases | Energy | 1.0000 | 0.9999 | 1.0001 | 0.8261 |
| Certain infectious and parasitic diseases | Energy from beverages | 1.0000 | 0.9998 | 1.0003 | 0.9136 |
| Certain infectious and parasitic diseases | Energy density | 1.0477 | 0.9147 | 1.2002 | 0.8261 |
| Certain infectious and parasitic diseases | Protein | 1.0049 | 0.9880 | 1.0221 | 0.8261 |
| Certain infectious and parasitic diseases | Vegetable protein | 0.9620 | 0.9303 | 0.9949 | 0.2996 |
| Certain infectious and parasitic diseases | Animal protein | 1.0100 | 0.9956 | 1.0246 | 0.6963 |
| Certain infectious and parasitic diseases | Fat | 1.0065 | 0.9917 | 1.0215 | 0.8047 |
| Certain infectious and parasitic diseases | Vegetable fat | 0.9897 | 0.9680 | 1.0120 | 0.7984 |
| Certain infectious and parasitic diseases | Animal fat | 1.0138 | 1.0002 | 1.0276 | 0.4217 |
| Certain infectious and parasitic diseases | Total sugars | 0.9990 | 0.9928 | 1.0052 | 0.8855 |
| Certain infectious and parasitic diseases | Free sugar | 1.0020 | 0.9949 | 1.0092 | 0.8261 |
| Certain infectious and parasitic diseases | Carbohydrate | 0.9967 | 0.9914 | 1.0020 | 0.7430 |
| Certain infectious and parasitic diseases | Saturated fatty acids | 1.0217 | 0.9915 | 1.0529 | 0.6963 |
| Certain infectious and parasitic diseases | n-3 fatty acids | 1.1948 | 0.9355 | 1.5258 | 0.6963 |
| Certain infectious and parasitic diseases | n-6 fatty acids | 0.9632 | 0.8937 | 1.0382 | 0.7984 |
| Certain infectious and parasitic diseases | Englyst fibre | 0.9525 | 0.9151 | 0.9915 | 0.2732 |
| Certain infectious and parasitic diseases | Calcium | 1.0004 | 0.9995 | 1.0013 | 0.7984 |
| Certain infectious and parasitic diseases | Iron | 0.9756 | 0.8950 | 1.0635 | 0.8261 |
| Certain infectious and parasitic diseases | Vitamin B6 | 0.8601 | 0.5180 | 1.4284 | 0.8261 |
| Certain infectious and parasitic diseases | Vitamin B12 | 1.0653 | 1.0305 | 1.1012 | 0.0040 |
| Certain infectious and parasitic diseases | Folate | 0.9974 | 0.9946 | 1.0002 | 0.5045 |
| Certain infectious and parasitic diseases | Vitamin C | 0.9981 | 0.9951 | 1.0012 | 0.7430 |
| Certain infectious and parasitic diseases | Potassium | 0.9998 | 0.9995 | 1.0001 | 0.6963 |
| Certain infectious and parasitic diseases | Magnesium | 0.9971 | 0.9930 | 1.0011 | 0.6963 |
| Certain infectious and parasitic diseases | Retinol | 1.0001 | 1.0001 | 1.0002 | 2.52E-04 |
| Certain infectious and parasitic diseases | Total carotene | 1.0000 | 0.9999 | 1.0001 | 0.8261 |
| Certain infectious and parasitic diseases | Vitamin E | 0.9916 | 0.9132 | 1.0768 | 0.9136 |
| Certain infectious and parasitic diseases | Vitamin D | 1.0215 | 0.9399 | 1.1102 | 0.8261 |
| Certain infectious and parasitic diseases | Alcohol | 1.0003 | 0.9940 | 1.0066 | 0.9397 |
| Certain infectious and parasitic diseases | Starch | 0.9959 | 0.9892 | 1.0027 | 0.7430 |
| Certain infectious and parasitic diseases | Monounsaturated fatty acids | 1.0095 | 0.9752 | 1.0450 | 0.8261 |
| Certain infectious and parasitic diseases | Zinc | 0.9608 | 0.8732 | 1.0572 | 0.8112 |
| Certain infectious and parasitic diseases | Thiamin | 0.7731 | 0.5322 | 1.1232 | 0.6963 |
| Certain infectious and parasitic diseases | Riboflavin | 1.1372 | 0.7177 | 1.8019 | 0.8261 |
| Certain infectious and parasitic diseases | Phosphorus | 1.0002 | 0.9991 | 1.0012 | 0.8855 |
| Certain infectious and parasitic diseases | Cholesterol | 0.9999 | 0.9984 | 1.0014 | 0.9139 |
| Certain infectious and parasitic diseases | Alpha-carotene | 1.0000 | 0.9996 | 1.0003 | 0.8988 |
| Certain infectious and parasitic diseases | Beta-carotene | 1.0000 | 0.9999 | 1.0001 | 0.8261 |
| Certain infectious and parasitic diseases | Beta cryptoxanthin | 0.9995 | 0.9982 | 1.0008 | 0.8261 |
| Certain infectious and parasitic diseases | Biotin | 0.9921 | 0.9740 | 1.0105 | 0.8047 |
| Certain infectious and parasitic diseases | Chloride | 1.0001 | 0.9999 | 1.0004 | 0.7984 |
| Certain infectious and parasitic diseases | Copper | 1.1770 | 0.5981 | 2.3164 | 0.8261 |
| Certain infectious and parasitic diseases | Fructose | 0.9969 | 0.9792 | 1.0150 | 0.8855 |
| Certain infectious and parasitic diseases | Glucose | 0.9948 | 0.9732 | 1.0169 | 0.8261 |
| Certain infectious and parasitic diseases | Haem iron | 1.4235 | 1.0186 | 1.9895 | 0.4061 |
| Certain infectious and parasitic diseases | Iodine | 1.0013 | 0.9992 | 1.0035 | 0.7430 |
| Certain infectious and parasitic diseases | Lactose | 1.0152 | 0.9847 | 1.0467 | 0.7984 |
| Certain infectious and parasitic diseases | Maltose | 0.9983 | 0.9636 | 1.0342 | 0.9397 |
| Certain infectious and parasitic diseases | Intrinsic and milk sugars | 0.9952 | 0.9848 | 1.0057 | 0.7984 |
| Certain infectious and parasitic diseases | Manganese | 0.8229 | 0.6655 | 1.0176 | 0.5045 |
| Certain infectious and parasitic diseases | Sodium | 1.0003 | 1.0000 | 1.0007 | 0.5516 |
| Certain infectious and parasitic diseases | Non-haem iron | 0.9578 | 0.8782 | 1.0447 | 0.7984 |
| Certain infectious and parasitic diseases | Niacin equivalent | 1.0084 | 0.9735 | 1.0446 | 0.8261 |
| Certain infectious and parasitic diseases | Non-milk extrinsic sugars | 1.0021 | 0.9949 | 1.0095 | 0.8261 |
| Certain infectious and parasitic diseases | Other Sugars | 0.9945 | 0.9116 | 1.0849 | 0.9397 |
| Certain infectious and parasitic diseases | Pantothenic acid | 0.9956 | 0.8448 | 1.1732 | 0.9575 |
| Certain infectious and parasitic diseases | Selenium | 1.0061 | 0.9950 | 1.0175 | 0.7984 |
| Certain infectious and parasitic diseases | Sucrose | 0.9977 | 0.9871 | 1.0083 | 0.8360 |
| Certain infectious and parasitic diseases | Total nitrogen | 1.0286 | 0.9267 | 1.1418 | 0.8261 |
| Certain infectious and parasitic diseases | Vitamin A retinol equivalents | 1.0001 | 1.0001 | 1.0002 | 0.0040 |
| Certain infectious and parasitic diseases | Trans fatty acids | 1.0503 | 0.7202 | 1.5317 | 0.8988 |
| Neoplasms | Total weight of all foods and beverages | 1.0000 | 1.0000 | 1.0000 | 0.5510 |
| Neoplasms | Total weight of beverages only | 1.0000 | 1.0000 | 1.0001 | 0.7834 |
| Neoplasms | Energy | 1.0000 | 1.0000 | 1.0000 | 0.6333 |
| Neoplasms | Energy from beverages | 1.0001 | 1.0000 | 1.0001 | 0.0147 |
| Neoplasms | Energy density | 1.0285 | 1.0104 | 1.0469 | 0.0109 |
| Neoplasms | Protein | 0.9971 | 0.9953 | 0.9989 | 0.0098 |
| Neoplasms | Vegetable protein | 0.9969 | 0.9929 | 1.0009 | 0.2490 |
| Neoplasms | Animal protein | 0.9980 | 0.9964 | 0.9997 | 0.0567 |
| Neoplasms | Fat | 1.0000 | 0.9981 | 1.0019 | 0.9927 |
| Neoplasms | Vegetable fat | 0.9990 | 0.9964 | 1.0015 | 0.5537 |
| Neoplasms | Animal fat | 1.0007 | 0.9986 | 1.0027 | 0.6469 |
| Neoplasms | Total sugars | 1.0003 | 0.9995 | 1.0011 | 0.6333 |
| Neoplasms | Free sugar | 1.0020 | 1.0011 | 1.0030 | 0.0006 |
| Neoplasms | Carbohydrate | 1.0000 | 0.9993 | 1.0007 | 0.9525 |
| Neoplasms | Saturated fatty acids | 1.0026 | 0.9988 | 1.0065 | 0.3134 |
| Neoplasms | n-3 fatty acids | 0.9401 | 0.9077 | 0.9738 | 0.0052 |
| Neoplasms | n-6 fatty acids | 0.9953 | 0.9873 | 1.0034 | 0.4045 |
| Neoplasms | Englyst fibre | 0.9911 | 0.9856 | 0.9966 | 0.0098 |
| Neoplasms | Calcium | 0.9998 | 0.9997 | 0.9999 | 0.0073 |
| Neoplasms | Iron | 0.9890 | 0.9776 | 1.0006 | 0.1421 |
| Neoplasms | Vitamin B6 | 0.9739 | 0.9209 | 1.0299 | 0.5183 |
| Neoplasms | Vitamin B12 | 0.9923 | 0.9828 | 1.0019 | 0.2326 |
| Neoplasms | Folate | 0.9998 | 0.9995 | 1.0002 | 0.4045 |
| Neoplasms | Vitamin C | 0.9999 | 0.9995 | 1.0004 | 0.8495 |
| Neoplasms | Potassium | 0.9999 | 0.9999 | 1.0000 | 0.0170 |
| Neoplasms | Magnesium | 0.9988 | 0.9983 | 0.9993 | 8.40E-05 |
| Neoplasms | Retinol | 1.0000 | 1.0000 | 1.0000 | 0.3134 |
| Neoplasms | Total carotene | 1.0000 | 1.0000 | 1.0000 | 0.4997 |
| Neoplasms | Vitamin E | 0.9948 | 0.9858 | 1.0039 | 0.4045 |
| Neoplasms | Vitamin D | 0.9843 | 0.9740 | 0.9946 | 0.0135 |
| Neoplasms | Alcohol | 1.0001 | 0.9992 | 1.0011 | 0.8495 |
| Neoplasms | Starch | 0.9996 | 0.9988 | 1.0005 | 0.5302 |
| Neoplasms | Monounsaturated fatty acids | 0.9991 | 0.9946 | 1.0036 | 0.7812 |
| Neoplasms | Zinc | 0.9881 | 0.9760 | 1.0003 | 0.1365 |
| Neoplasms | Thiamin | 0.9950 | 0.9450 | 1.0476 | 0.8841 |
| Neoplasms | Riboflavin | 0.9437 | 0.8886 | 1.0021 | 0.1368 |
| Neoplasms | Phosphorus | 0.9997 | 0.9996 | 0.9998 | 1.80E-05 |
| Neoplasms | Cholesterol | 0.9999 | 0.9997 | 1.0001 | 0.5200 |
| Neoplasms | Alpha-carotene | 1.0000 | 0.9999 | 1.0000 | 0.2895 |
| Neoplasms | Beta-carotene | 1.0000 | 1.0000 | 1.0000 | 0.5195 |
| Neoplasms | Beta cryptoxanthin | 1.0000 | 0.9999 | 1.0001 | 0.8841 |
| Neoplasms | Biotin | 0.9978 | 0.9954 | 1.0002 | 0.1650 |
| Neoplasms | Chloride | 1.0000 | 1.0000 | 1.0001 | 0.2579 |
| Neoplasms | Copper | 0.9193 | 0.8466 | 0.9982 | 0.1186 |
| Neoplasms | Fructose | 0.9976 | 0.9954 | 0.9998 | 0.1023 |
| Neoplasms | Glucose | 0.9981 | 0.9955 | 1.0006 | 0.2514 |
| Neoplasms | Haem iron | 1.0079 | 0.9497 | 1.0696 | 0.8495 |
| Neoplasms | Iodine | 0.9997 | 0.9994 | 1.0000 | 0.1944 |
| Neoplasms | Lactose | 0.9969 | 0.9930 | 1.0009 | 0.2484 |
| Neoplasms | Maltose | 1.0074 | 1.0026 | 1.0123 | 0.0130 |
| Neoplasms | Intrinsic and milk sugars | 0.9979 | 0.9967 | 0.9991 | 0.0052 |
| Neoplasms | Manganese | 0.9350 | 0.9121 | 0.9585 | 7.00E-06 |
| Neoplasms | Sodium | 1.0001 | 1.0000 | 1.0001 | 0.1322 |
| Neoplasms | Non-haem iron | 0.9878 | 0.9760 | 0.9997 | 0.1186 |
| Neoplasms | Niacin equivalent | 0.9946 | 0.9910 | 0.9981 | 0.0129 |
| Neoplasms | Non-milk extrinsic sugars | 1.0019 | 1.0009 | 1.0028 | 0.0026 |
| Neoplasms | Other Sugars | 1.0028 | 0.9910 | 1.0147 | 0.7483 |
| Neoplasms | Pantothenic acid | 0.9753 | 0.9570 | 0.9939 | 0.0296 |
| Neoplasms | Selenium | 0.9980 | 0.9967 | 0.9994 | 0.0170 |
| Neoplasms | Sucrose | 1.0021 | 1.0007 | 1.0035 | 0.0154 |
| Neoplasms | Total nitrogen | 0.9837 | 0.9719 | 0.9956 | 0.0247 |
| Neoplasms | Vitamin A retinol equivalents | 1.0000 | 1.0000 | 1.0000 | 0.5715 |
| Neoplasms | Trans fatty acids | 1.0152 | 0.9636 | 1.0695 | 0.6790 |
| Diseases of the blood system | Total weight of all foods and beverages | 1.0002 | 0.9997 | 1.0007 | 0.9884 |
| Diseases of the blood system | Total weight of beverages only | 1.0003 | 0.9996 | 1.0009 | 0.9884 |
| Diseases of the blood system | Energy | 1.0000 | 0.9998 | 1.0002 | 0.9884 |
| Diseases of the blood system | Energy from beverages | 1.0002 | 0.9998 | 1.0006 | 0.9884 |
| Diseases of the blood system | Energy density | 0.9524 | 0.7839 | 1.1572 | 0.9884 |
| Diseases of the blood system | Protein | 0.9833 | 0.9582 | 1.0090 | 0.8435 |
| Diseases of the blood system | Vegetable protein | 0.9945 | 0.9524 | 1.0384 | 0.9884 |
| Diseases of the blood system | Animal protein | 0.9865 | 0.9666 | 1.0069 | 0.8435 |
| Diseases of the blood system | Fat | 0.9829 | 0.9601 | 1.0063 | 0.8435 |
| Diseases of the blood system | Vegetable fat | 0.9993 | 0.9762 | 1.0229 | 0.9884 |
| Diseases of the blood system | Animal fat | 0.9799 | 0.9568 | 1.0035 | 0.8435 |
| Diseases of the blood system | Total sugars | 1.0030 | 0.9951 | 1.0110 | 0.9884 |
| Diseases of the blood system | Free sugar | 1.0069 | 0.9975 | 1.0163 | 0.8435 |
| Diseases of the blood system | Carbohydrate | 1.0028 | 0.9953 | 1.0103 | 0.9884 |
| Diseases of the blood system | Saturated fatty acids | 0.9725 | 0.9279 | 1.0193 | 0.9634 |
| Diseases of the blood system | n-3 fatty acids | 1.1166 | 0.6054 | 2.0596 | 0.9884 |
| Diseases of the blood system | n-6 fatty acids | 0.9465 | 0.8448 | 1.0603 | 0.9884 |
| Diseases of the blood system | Englyst fibre | 0.9945 | 0.9372 | 1.0552 | 0.9884 |
| Diseases of the blood system | Calcium | 1.0004 | 0.9992 | 1.0016 | 0.9884 |
| Diseases of the blood system | Iron | 0.9336 | 0.7910 | 1.1020 | 0.9884 |
| Diseases of the blood system | Vitamin B6 | 1.5620 | 0.7899 | 3.0890 | 0.8435 |
| Diseases of the blood system | Vitamin B12 | 0.9761 | 0.8468 | 1.1252 | 0.9884 |
| Diseases of the blood system | Folate | 1.0016 | 0.9972 | 1.0060 | 0.9884 |
| Diseases of the blood system | Vitamin C | 0.9976 | 0.9920 | 1.0032 | 0.9884 |
| Diseases of the blood system | Potassium | 1.0000 | 0.9996 | 1.0005 | 0.9884 |
| Diseases of the blood system | Magnesium | 1.0004 | 0.9943 | 1.0065 | 0.9884 |
| Diseases of the blood system | Retinol | 0.9992 | 0.9981 | 1.0003 | 0.8435 |
| Diseases of the blood system | Total carotene | 1.0000 | 0.9999 | 1.0002 | 0.9884 |
| Diseases of the blood system | Vitamin E | 1.0205 | 0.9043 | 1.1518 | 0.9884 |
| Diseases of the blood system | Vitamin D | 1.0331 | 0.8600 | 1.2410 | 0.9884 |
| Diseases of the blood system | Alcohol | 1.0021 | 0.9916 | 1.0127 | 0.9884 |
| Diseases of the blood system | Starch | 1.0007 | 0.9899 | 1.0116 | 0.9884 |
| Diseases of the blood system | Monounsaturated fatty acids | 0.9640 | 0.9131 | 1.0178 | 0.8435 |
| Diseases of the blood system | Zinc | 0.8203 | 0.6956 | 0.9673 | 0.5839 |
| Diseases of the blood system | Thiamin | 1.0352 | 0.5394 | 1.9866 | 0.9884 |
| Diseases of the blood system | Riboflavin | 0.9613 | 0.4820 | 1.9171 | 0.9884 |
| Diseases of the blood system | Phosphorus | 0.9996 | 0.9978 | 1.0015 | 0.9884 |
| Diseases of the blood system | Cholesterol | 0.9967 | 0.9932 | 1.0001 | 0.8435 |
| Diseases of the blood system | Alpha-carotene | 1.0001 | 0.9994 | 1.0008 | 0.9884 |
| Diseases of the blood system | Beta-carotene | 1.0001 | 0.9999 | 1.0002 | 0.9884 |
| Diseases of the blood system | Beta cryptoxanthin | 0.9969 | 0.9928 | 1.0010 | 0.8435 |
| Diseases of the blood system | Biotin | 0.9833 | 0.9497 | 1.0181 | 0.9884 |
| Diseases of the blood system | Chloride | 0.9998 | 0.9994 | 1.0002 | 0.9884 |
| Diseases of the blood system | Copper | 0.4638 | 0.1875 | 1.1473 | 0.8435 |
| Diseases of the blood system | Fructose | 1.0013 | 0.9825 | 1.0206 | 0.9884 |
| Diseases of the blood system | Glucose | 1.0066 | 0.9861 | 1.0274 | 0.9884 |
| Diseases of the blood system | Haem iron | 0.3934 | 0.1696 | 0.9121 | 0.6230 |
| Diseases of the blood system | Iodine | 0.9999 | 0.9965 | 1.0032 | 0.9884 |
| Diseases of the blood system | Lactose | 1.0085 | 0.9634 | 1.0558 | 0.9884 |
| Diseases of the blood system | Maltose | 1.0479 | 1.0163 | 1.0804 | 0.1721 |
| Diseases of the blood system | Intrinsic and milk sugars | 1.0001 | 0.9875 | 1.0129 | 0.9987 |
| Diseases of the blood system | Manganese | 1.0002 | 0.7675 | 1.3036 | 0.9987 |
| Diseases of the blood system | Sodium | 0.9997 | 0.9991 | 1.0003 | 0.9884 |
| Diseases of the blood system | Non-haem iron | 0.9566 | 0.8130 | 1.1255 | 0.9884 |
| Diseases of the blood system | Niacin equivalent | 0.9928 | 0.9402 | 1.0484 | 0.9884 |
| Diseases of the blood system | Non-milk extrinsic sugars | 1.0052 | 0.9950 | 1.0155 | 0.9884 |
| Diseases of the blood system | Other Sugars | 1.0190 | 0.9425 | 1.1017 | 0.9884 |
| Diseases of the blood system | Pantothenic acid | 1.0321 | 0.8102 | 1.3147 | 0.9884 |
| Diseases of the blood system | Selenium | 0.9936 | 0.9716 | 1.0160 | 0.9884 |
| Diseases of the blood system | Sucrose | 1.0008 | 0.9853 | 1.0165 | 0.9884 |
| Diseases of the blood system | Total nitrogen | 0.8698 | 0.7385 | 1.0245 | 0.8435 |
| Diseases of the blood system | Vitamin A retinol equivalents | 0.9998 | 0.9994 | 1.0003 | 0.9884 |
| Diseases of the blood system | Trans fatty acids | 0.7773 | 0.3427 | 1.7633 | 0.9884 |
| Endocrine, nutritional and metabolic diseases | Total weight of all foods and beverages | 1.0001 | 0.9998 | 1.0003 | 0.8738 |
| Endocrine, nutritional and metabolic diseases | Total weight of beverages only | 1.0001 | 0.9998 | 1.0004 | 0.8738 |
| Endocrine, nutritional and metabolic diseases | Energy | 1.0000 | 0.9998 | 1.0001 | 0.8738 |
| Endocrine, nutritional and metabolic diseases | Energy from beverages | 0.9999 | 0.9996 | 1.0002 | 0.8738 |
| Endocrine, nutritional and metabolic diseases | Energy density | 0.9989 | 0.8725 | 1.1436 | 0.9877 |
| Endocrine, nutritional and metabolic diseases | Protein | 0.9969 | 0.9837 | 1.0103 | 0.8738 |
| Endocrine, nutritional and metabolic diseases | Vegetable protein | 0.9865 | 0.9576 | 1.0162 | 0.8646 |
| Endocrine, nutritional and metabolic diseases | Animal protein | 0.9998 | 0.9881 | 1.0117 | 0.9877 |
| Endocrine, nutritional and metabolic diseases | Fat | 0.9859 | 0.9726 | 0.9993 | 0.4311 |
| Endocrine, nutritional and metabolic diseases | Vegetable fat | 0.9891 | 0.9682 | 1.0105 | 0.8603 |
| Endocrine, nutritional and metabolic diseases | Animal fat | 0.9912 | 0.9755 | 1.0071 | 0.8603 |
| Endocrine, nutritional and metabolic diseases | Total sugars | 0.9970 | 0.9911 | 1.0030 | 0.8603 |
| Endocrine, nutritional and metabolic diseases | Free sugar | 0.9987 | 0.9905 | 1.0069 | 0.8738 |
| Endocrine, nutritional and metabolic diseases | Carbohydrate | 0.9950 | 0.9906 | 0.9993 | 0.4311 |
| Endocrine, nutritional and metabolic diseases | Saturated fatty acids | 0.9839 | 0.9541 | 1.0146 | 0.8603 |
| Endocrine, nutritional and metabolic diseases | n-3 fatty acids | 0.9857 | 0.6978 | 1.3923 | 0.9828 |
| Endocrine, nutritional and metabolic diseases | n-6 fatty acids | 0.9374 | 0.8667 | 1.0138 | 0.6634 |
| Endocrine, nutritional and metabolic diseases | Englyst fibre | 0.9899 | 0.9468 | 1.0350 | 0.8738 |
| Endocrine, nutritional and metabolic diseases | Calcium | 1.0000 | 0.9992 | 1.0008 | 0.9828 |
| Endocrine, nutritional and metabolic diseases | Iron | 0.9507 | 0.8566 | 1.0551 | 0.8603 |
| Endocrine, nutritional and metabolic diseases | Vitamin B6 | 0.7072 | 0.4627 | 1.0809 | 0.6634 |
| Endocrine, nutritional and metabolic diseases | Vitamin B12 | 1.0048 | 0.9402 | 1.0738 | 0.9645 |
| Endocrine, nutritional and metabolic diseases | Folate | 0.9987 | 0.9961 | 1.0013 | 0.8603 |
| Endocrine, nutritional and metabolic diseases | Vitamin C | 1.0009 | 0.9980 | 1.0038 | 0.8738 |
| Endocrine, nutritional and metabolic diseases | Potassium | 0.9998 | 0.9995 | 1.0001 | 0.6830 |
| Endocrine, nutritional and metabolic diseases | Magnesium | 0.9989 | 0.9946 | 1.0032 | 0.8738 |
| Endocrine, nutritional and metabolic diseases | Retinol | 0.9999 | 0.9997 | 1.0002 | 0.8738 |
| Endocrine, nutritional and metabolic diseases | Total carotene | 1.0000 | 0.9999 | 1.0001 | 0.8738 |
| Endocrine, nutritional and metabolic diseases | Vitamin E | 0.9362 | 0.8621 | 1.0167 | 0.6634 |
| Endocrine, nutritional and metabolic diseases | Vitamin D | 0.9660 | 0.8585 | 1.0869 | 0.8738 |
| Endocrine, nutritional and metabolic diseases | Alcohol | 1.0057 | 1.0005 | 1.0108 | 0.4311 |
| Endocrine, nutritional and metabolic diseases | Starch | 0.9956 | 0.9891 | 1.0022 | 0.7927 |
| Endocrine, nutritional and metabolic diseases | Monounsaturated fatty acids | 0.9676 | 0.9365 | 0.9997 | 0.4311 |
| Endocrine, nutritional and metabolic diseases | Zinc | 0.9357 | 0.8319 | 1.0524 | 0.8603 |
| Endocrine, nutritional and metabolic diseases | Thiamin | 0.8578 | 0.5605 | 1.3127 | 0.8738 |
| Endocrine, nutritional and metabolic diseases | Riboflavin | 0.7323 | 0.4525 | 1.1850 | 0.8053 |
| Endocrine, nutritional and metabolic diseases | Phosphorus | 1.0000 | 0.9990 | 1.0010 | 0.9868 |
| Endocrine, nutritional and metabolic diseases | Cholesterol | 0.9997 | 0.9984 | 1.0011 | 0.8738 |
| Endocrine, nutritional and metabolic diseases | Alpha-carotene | 1.0000 | 0.9997 | 1.0004 | 0.9312 |
| Endocrine, nutritional and metabolic diseases | Beta-carotene | 1.0000 | 0.9999 | 1.0001 | 0.9279 |
| Endocrine, nutritional and metabolic diseases | Beta cryptoxanthin | 1.0003 | 1.0000 | 1.0006 | 0.4311 |
| Endocrine, nutritional and metabolic diseases | Biotin | 0.9954 | 0.9771 | 1.0141 | 0.8738 |
| Endocrine, nutritional and metabolic diseases | Chloride | 0.9999 | 0.9996 | 1.0002 | 0.8738 |
| Endocrine, nutritional and metabolic diseases | Copper | 0.8617 | 0.4143 | 1.7923 | 0.8738 |
| Endocrine, nutritional and metabolic diseases | Fructose | 1.0063 | 0.9900 | 1.0229 | 0.8738 |
| Endocrine, nutritional and metabolic diseases | Glucose | 1.0049 | 0.9861 | 1.0241 | 0.8738 |
| Endocrine, nutritional and metabolic diseases | Haem iron | 0.9265 | 0.5926 | 1.4484 | 0.8738 |
| Endocrine, nutritional and metabolic diseases | Iodine | 1.0022 | 1.0006 | 1.0038 | 0.4311 |
| Endocrine, nutritional and metabolic diseases | Lactose | 0.9820 | 0.9540 | 1.0109 | 0.8179 |
| Endocrine, nutritional and metabolic diseases | Maltose | 0.9829 | 0.9363 | 1.0318 | 0.8738 |
| Endocrine, nutritional and metabolic diseases | Intrinsic and milk sugars | 0.9973 | 0.9881 | 1.0066 | 0.8738 |
| Endocrine, nutritional and metabolic diseases | Manganese | 0.9048 | 0.7386 | 1.1084 | 0.8603 |
| Endocrine, nutritional and metabolic diseases | Sodium | 0.9999 | 0.9995 | 1.0003 | 0.8738 |
| Endocrine, nutritional and metabolic diseases | Non-haem iron | 0.9527 | 0.8568 | 1.0593 | 0.8646 |
| Endocrine, nutritional and metabolic diseases | Niacin equivalent | 0.9899 | 0.9625 | 1.0182 | 0.8738 |
| Endocrine, nutritional and metabolic diseases | Non-milk extrinsic sugars | 0.9985 | 0.9906 | 1.0066 | 0.8738 |
| Endocrine, nutritional and metabolic diseases | Other Sugars | 0.8788 | 0.7701 | 1.0028 | 0.4334 |
| Endocrine, nutritional and metabolic diseases | Pantothenic acid | 0.8563 | 0.7353 | 0.9973 | 0.4311 |
| Endocrine, nutritional and metabolic diseases | Selenium | 1.0074 | 0.9979 | 1.0169 | 0.6634 |
| Endocrine, nutritional and metabolic diseases | Sucrose | 0.9921 | 0.9814 | 1.0029 | 0.6830 |
| Endocrine, nutritional and metabolic diseases | Total nitrogen | 0.9791 | 0.8937 | 1.0727 | 0.8738 |
| Endocrine, nutritional and metabolic diseases | Vitamin A retinol equivalents | 1.0000 | 0.9998 | 1.0002 | 0.9312 |
| Endocrine, nutritional and metabolic diseases | Trans fatty acids | 0.8740 | 0.5825 | 1.3114 | 0.8738 |
| Mental and behavioural disorders | Total weight of all foods and beverages | 1.0000 | 0.9998 | 1.0003 | 0.9539 |
| Mental and behavioural disorders | Total weight of beverages only | 1.0000 | 0.9997 | 1.0002 | 0.9588 |
| Mental and behavioural disorders | Energy | 1.0000 | 0.9999 | 1.0001 | 0.9336 |
| Mental and behavioural disorders | Energy from beverages | 1.0000 | 0.9999 | 1.0002 | 0.9539 |
| Mental and behavioural disorders | Energy density | 0.9295 | 0.8238 | 1.0487 | 0.8708 |
| Mental and behavioural disorders | Protein | 1.0010 | 0.9903 | 1.0117 | 0.9588 |
| Mental and behavioural disorders | Vegetable protein | 0.9816 | 0.9560 | 1.0080 | 0.7895 |
| Mental and behavioural disorders | Animal protein | 1.0040 | 0.9944 | 1.0137 | 0.9336 |
| Mental and behavioural disorders | Fat | 0.9945 | 0.9826 | 1.0065 | 0.9336 |
| Mental and behavioural disorders | Vegetable fat | 0.9870 | 0.9714 | 1.0029 | 0.6829 |
| Mental and behavioural disorders | Animal fat | 1.0024 | 0.9893 | 1.0156 | 0.9539 |
| Mental and behavioural disorders | Total sugars | 1.0075 | 1.0031 | 1.0118 | 0.0476 |
| Mental and behavioural disorders | Free sugar | 1.0076 | 1.0024 | 1.0128 | 0.0841 |
| Mental and behavioural disorders | Carbohydrate | 1.0018 | 0.9972 | 1.0065 | 0.9336 |
| Mental and behavioural disorders | Saturated fatty acids | 1.0035 | 0.9799 | 1.0277 | 0.9539 |
| Mental and behavioural disorders | n-3 fatty acids | 0.9687 | 0.8140 | 1.1529 | 0.9539 |
| Mental and behavioural disorders | n-6 fatty acids | 0.9535 | 0.9063 | 1.0031 | 0.4588 |
| Mental and behavioural disorders | Englyst fibre | 0.9915 | 0.9576 | 1.0267 | 0.9539 |
| Mental and behavioural disorders | Calcium | 1.0002 | 0.9996 | 1.0008 | 0.9336 |
| Mental and behavioural disorders | Iron | 0.9645 | 0.8957 | 1.0386 | 0.9336 |
| Mental and behavioural disorders | Vitamin B6 | 1.1703 | 0.8606 | 1.5915 | 0.9336 |
| Mental and behavioural disorders | Vitamin B12 | 1.0153 | 0.9758 | 1.0565 | 0.9336 |
| Mental and behavioural disorders | Folate | 0.9999 | 0.9977 | 1.0020 | 0.9588 |
| Mental and behavioural disorders | Vitamin C | 1.0015 | 0.9994 | 1.0035 | 0.7895 |
| Mental and behavioural disorders | Potassium | 1.0000 | 0.9998 | 1.0003 | 0.9539 |
| Mental and behavioural disorders | Magnesium | 0.9994 | 0.9963 | 1.0025 | 0.9539 |
| Mental and behavioural disorders | Retinol | 1.0000 | 0.9998 | 1.0002 | 0.9948 |
| Mental and behavioural disorders | Total carotene | 1.0000 | 1.0000 | 1.0001 | 0.9539 |
| Mental and behavioural disorders | Vitamin E | 0.9710 | 0.9205 | 1.0244 | 0.9336 |
| Mental and behavioural disorders | Vitamin D | 1.0311 | 0.9872 | 1.0770 | 0.7895 |
| Mental and behavioural disorders | Alcohol | 0.9979 | 0.9907 | 1.0051 | 0.9336 |
| Mental and behavioural disorders | Starch | 0.9928 | 0.9878 | 0.9980 | 0.0841 |
| Mental and behavioural disorders | Monounsaturated fatty acids | 0.9818 | 0.9538 | 1.0107 | 0.8449 |
| Mental and behavioural disorders | Zinc | 0.9800 | 0.8966 | 1.0711 | 0.9539 |
| Mental and behavioural disorders | Thiamin | 1.0884 | 0.8143 | 1.4548 | 0.9336 |
| Mental and behavioural disorders | Riboflavin | 1.1284 | 0.8390 | 1.5175 | 0.9336 |
| Mental and behavioural disorders | Phosphorus | 1.0002 | 0.9995 | 1.0009 | 0.9336 |
| Mental and behavioural disorders | Cholesterol | 1.0001 | 0.9988 | 1.0014 | 0.9588 |
| Mental and behavioural disorders | Alpha-carotene | 1.0000 | 0.9998 | 1.0002 | 0.9761 |
| Mental and behavioural disorders | Beta-carotene | 1.0000 | 1.0000 | 1.0001 | 0.9539 |
| Mental and behavioural disorders | Beta cryptoxanthin | 1.0001 | 0.9998 | 1.0005 | 0.9336 |
| Mental and behavioural disorders | Biotin | 0.9962 | 0.9827 | 1.0098 | 0.9336 |
| Mental and behavioural disorders | Chloride | 1.0000 | 0.9998 | 1.0002 | 0.9588 |
| Mental and behavioural disorders | Copper | 0.8220 | 0.4896 | 1.3802 | 0.9336 |
| Mental and behavioural disorders | Fructose | 1.0159 | 1.0044 | 1.0276 | 0.0841 |
| Mental and behavioural disorders | Glucose | 1.0181 | 1.0045 | 1.0318 | 0.0876 |
| Mental and behavioural disorders | Haem iron | 0.9697 | 0.6347 | 1.4813 | 0.9588 |
| Mental and behavioural disorders | Iodine | 1.0004 | 0.9991 | 1.0018 | 0.9336 |
| Mental and behavioural disorders | Lactose | 1.0136 | 0.9934 | 1.0341 | 0.7895 |
| Mental and behavioural disorders | Maltose | 0.9832 | 0.9497 | 1.0179 | 0.9336 |
| Mental and behavioural disorders | Intrinsic and milk sugars | 1.0068 | 1.0008 | 1.0128 | 0.2042 |
| Mental and behavioural disorders | Manganese | 0.9068 | 0.7854 | 1.0470 | 0.7895 |
| Mental and behavioural disorders | Sodium | 1.0000 | 0.9997 | 1.0003 | 0.9588 |
| Mental and behavioural disorders | Non-haem iron | 0.9632 | 0.8927 | 1.0392 | 0.9336 |
| Mental and behavioural disorders | Niacin equivalent | 1.0009 | 0.9784 | 1.0240 | 0.9761 |
| Mental and behavioural disorders | Non-milk extrinsic sugars | 1.0071 | 1.0017 | 1.0126 | 0.0876 |
| Mental and behavioural disorders | Other Sugars | 1.0131 | 0.9542 | 1.0756 | 0.9539 |
| Mental and behavioural disorders | Pantothenic acid | 1.0337 | 0.9353 | 1.1426 | 0.9336 |
| Mental and behavioural disorders | Selenium | 1.0033 | 0.9962 | 1.0104 | 0.9336 |
| Mental and behavioural disorders | Sucrose | 1.0106 | 1.0037 | 1.0176 | 0.0828 |
| Mental and behavioural disorders | Total nitrogen | 0.9946 | 0.9256 | 1.0687 | 0.9588 |
| Mental and behavioural disorders | Vitamin A retinol equivalents | 1.0000 | 0.9999 | 1.0001 | 0.9761 |
| Mental and behavioural disorders | Trans fatty acids | 0.9113 | 0.6683 | 1.2425 | 0.9336 |
| Diseases of the nervous system | Total weight of all foods and beverages | 1.0000 | 0.9999 | 1.0001 | 0.9404 |
| Diseases of the nervous system | Total weight of beverages only | 0.9999 | 0.9998 | 1.0001 | 0.8354 |
| Diseases of the nervous system | Energy | 1.0000 | 1.0000 | 1.0000 | 0.9634 |
| Diseases of the nervous system | Energy from beverages | 0.9999 | 0.9998 | 1.0000 | 0.6985 |
| Diseases of the nervous system | Energy density | 1.0014 | 0.9434 | 1.0630 | 0.9634 |
| Diseases of the nervous system | Protein | 0.9974 | 0.9918 | 1.0030 | 0.8354 |
| Diseases of the nervous system | Vegetable protein | 1.0005 | 0.9877 | 1.0134 | 0.9634 |
| Diseases of the nervous system | Animal protein | 0.9976 | 0.9925 | 1.0028 | 0.8354 |
| Diseases of the nervous system | Fat | 0.9965 | 0.9905 | 1.0025 | 0.7282 |
| Diseases of the nervous system | Vegetable fat | 1.0006 | 0.9923 | 1.0089 | 0.9634 |
| Diseases of the nervous system | Animal fat | 0.9955 | 0.9889 | 1.0023 | 0.6390 |
| Diseases of the nervous system | Total sugars | 1.0045 | 1.0021 | 1.0069 | 0.0126 |
| Diseases of the nervous system | Free sugar | 1.0045 | 1.0015 | 1.0075 | 0.0421 |
| Diseases of the nervous system | Carbohydrate | 1.0032 | 1.0009 | 1.0055 | 0.0478 |
| Diseases of the nervous system | Saturated fatty acids | 0.9969 | 0.9848 | 1.0092 | 0.9404 |
| Diseases of the nervous system | n-3 fatty acids | 0.9585 | 0.8631 | 1.0646 | 0.8444 |
| Diseases of the nervous system | n-6 fatty acids | 0.9909 | 0.9647 | 1.0177 | 0.8780 |
| Diseases of the nervous system | Englyst fibre | 1.0118 | 0.9943 | 1.0296 | 0.6390 |
| Diseases of the nervous system | Calcium | 0.9998 | 0.9994 | 1.0002 | 0.8354 |
| Diseases of the nervous system | Iron | 0.9917 | 0.9575 | 1.0271 | 0.9404 |
| Diseases of the nervous system | Vitamin B6 | 1.0724 | 0.9031 | 1.2735 | 0.8444 |
| Diseases of the nervous system | Vitamin B12 | 0.9974 | 0.9690 | 1.0267 | 0.9634 |
| Diseases of the nervous system | Folate | 1.0002 | 0.9991 | 1.0012 | 0.9634 |
| Diseases of the nervous system | Vitamin C | 1.0011 | 0.9999 | 1.0023 | 0.2978 |
| Diseases of the nervous system | Potassium | 1.0000 | 0.9999 | 1.0001 | 0.9634 |
| Diseases of the nervous system | Magnesium | 1.0000 | 0.9985 | 1.0016 | 0.9634 |
| Diseases of the nervous system | Retinol | 1.0000 | 1.0000 | 1.0001 | 0.8780 |
| Diseases of the nervous system | Total carotene | 1.0000 | 1.0000 | 1.0001 | 0.1803 |
| Diseases of the nervous system | Vitamin E | 0.9973 | 0.9694 | 1.0260 | 0.9634 |
| Diseases of the nervous system | Vitamin D | 0.9821 | 0.9512 | 1.0140 | 0.7330 |
| Diseases of the nervous system | Alcohol | 0.9992 | 0.9959 | 1.0025 | 0.9404 |
| Diseases of the nervous system | Starch | 0.9994 | 0.9966 | 1.0022 | 0.9404 |
| Diseases of the nervous system | Monounsaturated fatty acids | 0.9906 | 0.9760 | 1.0055 | 0.6801 |
| Diseases of the nervous system | Zinc | 0.9849 | 0.9465 | 1.0250 | 0.8692 |
| Diseases of the nervous system | Thiamin | 1.0545 | 0.9118 | 1.2195 | 0.8780 |
| Diseases of the nervous system | Riboflavin | 1.0100 | 0.8419 | 1.2118 | 0.9634 |
| Diseases of the nervous system | Phosphorus | 1.0000 | 0.9996 | 1.0004 | 0.9634 |
| Diseases of the nervous system | Cholesterol | 0.9997 | 0.9991 | 1.0004 | 0.8354 |
| Diseases of the nervous system | Alpha-carotene | 1.0002 | 1.0001 | 1.0003 | 0.0421 |
| Diseases of the nervous system | Beta-carotene | 1.0000 | 1.0000 | 1.0001 | 0.1880 |
| Diseases of the nervous system | Beta cryptoxanthin | 1.0000 | 0.9998 | 1.0002 | 0.9634 |
| Diseases of the nervous system | Biotin | 0.9942 | 0.9867 | 1.0018 | 0.4893 |
| Diseases of the nervous system | Chloride | 0.9999 | 0.9998 | 1.0000 | 0.1880 |
| Diseases of the nervous system | Copper | 1.0670 | 0.8562 | 1.3297 | 0.9342 |
| Diseases of the nervous system | Fructose | 1.0103 | 1.0038 | 1.0169 | 0.0350 |
| Diseases of the nervous system | Glucose | 1.0132 | 1.0058 | 1.0207 | 0.0140 |
| Diseases of the nervous system | Haem iron | 0.9644 | 0.7897 | 1.1777 | 0.9634 |
| Diseases of the nervous system | Iodine | 1.0003 | 0.9994 | 1.0012 | 0.8780 |
| Diseases of the nervous system | Lactose | 0.9989 | 0.9864 | 1.0116 | 0.9634 |
| Diseases of the nervous system | Maltose | 1.0018 | 0.9855 | 1.0184 | 0.9634 |
| Diseases of the nervous system | Intrinsic and milk sugars | 1.0031 | 0.9995 | 1.0068 | 0.3894 |
| Diseases of the nervous system | Manganese | 1.0039 | 0.9296 | 1.0842 | 0.9634 |
| Diseases of the nervous system | Sodium | 0.9998 | 0.9997 | 1.0000 | 0.2589 |
| Diseases of the nervous system | Non-haem iron | 0.9921 | 0.9577 | 1.0278 | 0.9404 |
| Diseases of the nervous system | Niacin equivalent | 0.9950 | 0.9842 | 1.0060 | 0.8354 |
| Diseases of the nervous system | Non-milk extrinsic sugars | 1.0048 | 1.0017 | 1.0078 | 0.0350 |
| Diseases of the nervous system | Other Sugars | 1.0246 | 0.9943 | 1.0558 | 0.4461 |
| Diseases of the nervous system | Pantothenic acid | 0.9925 | 0.9364 | 1.0520 | 0.9634 |
| Diseases of the nervous system | Selenium | 1.0003 | 0.9965 | 1.0042 | 0.9634 |
| Diseases of the nervous system | Sucrose | 1.0060 | 1.0018 | 1.0101 | 0.0421 |
| Diseases of the nervous system | Total nitrogen | 0.9840 | 0.9477 | 1.0216 | 0.8378 |
| Diseases of the nervous system | Vitamin A retinol equivalents | 1.0001 | 1.0000 | 1.0001 | 0.2726 |
| Diseases of the nervous system | Trans fatty acids | 0.9639 | 0.8132 | 1.1426 | 0.9404 |
| Diseases of the circulatory system | Total weight of all foods and beverages | 1.0000 | 0.9999 | 1.0001 | 0.9289 |
| Diseases of the circulatory system | Total weight of beverages only | 1.0000 | 0.9999 | 1.0001 | 0.9289 |
| Diseases of the circulatory system | Energy | 1.0000 | 1.0000 | 1.0000 | 0.5771 |
| Diseases of the circulatory system | Energy from beverages | 1.0000 | 1.0000 | 1.0001 | 0.9289 |
| Diseases of the circulatory system | Energy density | 1.0207 | 0.9902 | 1.0522 | 0.4501 |
| Diseases of the circulatory system | Protein | 1.0027 | 0.9997 | 1.0058 | 0.3243 |
| Diseases of the circulatory system | Vegetable protein | 0.9984 | 0.9916 | 1.0052 | 0.8566 |
| Diseases of the circulatory system | Animal protein | 1.0027 | 0.9999 | 1.0055 | 0.3211 |
| Diseases of the circulatory system | Fat | 1.0004 | 0.9970 | 1.0038 | 0.9289 |
| Diseases of the circulatory system | Vegetable fat | 0.9962 | 0.9919 | 1.0006 | 0.3243 |
| Diseases of the circulatory system | Animal fat | 1.0030 | 0.9994 | 1.0065 | 0.3303 |
| Diseases of the circulatory system | Total sugars | 0.9989 | 0.9975 | 1.0003 | 0.3547 |
| Diseases of the circulatory system | Free sugar | 1.0003 | 0.9985 | 1.0021 | 0.9289 |
| Diseases of the circulatory system | Carbohydrate | 0.9992 | 0.9980 | 1.0004 | 0.4704 |
| Diseases of the circulatory system | Saturated fatty acids | 1.0022 | 0.9955 | 1.0090 | 0.7892 |
| Diseases of the circulatory system | n-3 fatty acids | 1.0078 | 0.9529 | 1.0659 | 0.9289 |
| Diseases of the circulatory system | n-6 fatty acids | 0.9914 | 0.9775 | 1.0055 | 0.5199 |
| Diseases of the circulatory system | Englyst fibre | 0.9923 | 0.9828 | 1.0019 | 0.3509 |
| Diseases of the circulatory system | Calcium | 0.9999 | 0.9997 | 1.0001 | 0.4466 |
| Diseases of the circulatory system | Iron | 0.9895 | 0.9696 | 1.0099 | 0.5771 |
| Diseases of the circulatory system | Vitamin B6 | 1.0085 | 0.9162 | 1.1101 | 0.9289 |
| Diseases of the circulatory system | Vitamin B12 | 1.0018 | 0.9874 | 1.0163 | 0.9289 |
| Diseases of the circulatory system | Folate | 0.9999 | 0.9993 | 1.0005 | 0.9289 |
| Diseases of the circulatory system | Vitamin C | 0.9997 | 0.9990 | 1.0004 | 0.6755 |
| Diseases of the circulatory system | Potassium | 0.9999 | 0.9999 | 1.0000 | 0.2164 |
| Diseases of the circulatory system | Magnesium | 0.9988 | 0.9979 | 0.9996 | 0.0739 |
| Diseases of the circulatory system | Retinol | 1.0000 | 0.9999 | 1.0001 | 0.9289 |
| Diseases of the circulatory system | Total carotene | 1.0000 | 1.0000 | 1.0000 | 0.5771 |
| Diseases of the circulatory system | Vitamin E | 0.9852 | 0.9699 | 1.0008 | 0.3211 |
| Diseases of the circulatory system | Vitamin D | 1.0066 | 0.9904 | 1.0231 | 0.6755 |
| Diseases of the circulatory system | Alcohol | 1.0004 | 0.9987 | 1.0022 | 0.8566 |
| Diseases of the circulatory system | Starch | 1.0001 | 0.9986 | 1.0016 | 0.9346 |
| Diseases of the circulatory system | Monounsaturated fatty acids | 1.0008 | 0.9928 | 1.0088 | 0.9289 |
| Diseases of the circulatory system | Zinc | 1.0081 | 0.9877 | 1.0290 | 0.6762 |
| Diseases of the circulatory system | Thiamin | 1.0733 | 0.9839 | 1.1709 | 0.3492 |
| Diseases of the circulatory system | Riboflavin | 0.9423 | 0.8530 | 1.0409 | 0.5228 |
| Diseases of the circulatory system | Phosphorus | 0.9999 | 0.9997 | 1.0001 | 0.5895 |
| Diseases of the circulatory system | Cholesterol | 1.0003 | 1.0000 | 1.0006 | 0.3211 |
| Diseases of the circulatory system | Alpha-carotene | 1.0000 | 0.9999 | 1.0001 | 0.8566 |
| Diseases of the circulatory system | Beta-carotene | 1.0000 | 1.0000 | 1.0000 | 0.5771 |
| Diseases of the circulatory system | Beta cryptoxanthin | 0.9999 | 0.9997 | 1.0000 | 0.4004 |
| Diseases of the circulatory system | Biotin | 0.9965 | 0.9924 | 1.0006 | 0.3243 |
| Diseases of the circulatory system | Chloride | 1.0001 | 1.0001 | 1.0002 | 0.0103 |
| Diseases of the circulatory system | Copper | 0.8332 | 0.7182 | 0.9666 | 0.2020 |
| Diseases of the circulatory system | Fructose | 0.9964 | 0.9925 | 1.0003 | 0.3211 |
| Diseases of the circulatory system | Glucose | 0.9957 | 0.9912 | 1.0003 | 0.3211 |
| Diseases of the circulatory system | Haem iron | 1.0847 | 0.9866 | 1.1925 | 0.3243 |
| Diseases of the circulatory system | Iodine | 0.9999 | 0.9993 | 1.0004 | 0.8566 |
| Diseases of the circulatory system | Lactose | 0.9923 | 0.9854 | 0.9992 | 0.2258 |
| Diseases of the circulatory system | Maltose | 1.0007 | 0.9929 | 1.0086 | 0.9289 |
| Diseases of the circulatory system | Intrinsic and milk sugars | 0.9978 | 0.9958 | 0.9999 | 0.2738 |
| Diseases of the circulatory system | Manganese | 0.9219 | 0.8839 | 0.9616 | 0.0049 |
| Diseases of the circulatory system | Sodium | 1.0002 | 1.0001 | 1.0003 | 0.0049 |
| Diseases of the circulatory system | Non-haem iron | 0.9857 | 0.9651 | 1.0068 | 0.4501 |
| Diseases of the circulatory system | Niacin equivalent | 1.0032 | 0.9971 | 1.0093 | 0.5771 |
| Diseases of the circulatory system | Non-milk extrinsic sugars | 0.9999 | 0.9981 | 1.0017 | 0.9346 |
| Diseases of the circulatory system | Other Sugars | 1.0051 | 0.9860 | 1.0246 | 0.8566 |
| Diseases of the circulatory system | Pantothenic acid | 0.9841 | 0.9529 | 1.0163 | 0.5771 |
| Diseases of the circulatory system | Selenium | 1.0013 | 0.9991 | 1.0036 | 0.5228 |
| Diseases of the circulatory system | Sucrose | 1.0001 | 0.9976 | 1.0025 | 0.9687 |
| Diseases of the circulatory system | Total nitrogen | 1.0234 | 1.0026 | 1.0446 | 0.2258 |
| Diseases of the circulatory system | Vitamin A retinol equivalents | 1.0000 | 0.9999 | 1.0000 | 0.6755 |
| Diseases of the circulatory system | Trans fatty acids | 1.0081 | 0.9155 | 1.1100 | 0.9289 |
| Diseases of the respiratory system | Total weight of all foods and beverages | 1.0001 | 1.0000 | 1.0002 | 0.1516 |
| Diseases of the respiratory system | Total weight of beverages only | 1.0001 | 1.0000 | 1.0003 | 0.1601 |
| Diseases of the respiratory system | Energy | 1.0000 | 1.0000 | 1.0001 | 0.3780 |
| Diseases of the respiratory system | Energy from beverages | 1.0001 | 1.0000 | 1.0002 | 0.1601 |
| Diseases of the respiratory system | Energy density | 0.9874 | 0.9310 | 1.0473 | 0.9562 |
| Diseases of the respiratory system | Protein | 0.9987 | 0.9930 | 1.0045 | 0.9562 |
| Diseases of the respiratory system | Vegetable protein | 0.9909 | 0.9772 | 1.0047 | 0.5102 |
| Diseases of the respiratory system | Animal protein | 1.0002 | 0.9949 | 1.0054 | 0.9630 |
| Diseases of the respiratory system | Fat | 0.9958 | 0.9900 | 1.0016 | 0.4215 |
| Diseases of the respiratory system | Vegetable fat | 0.9858 | 0.9774 | 0.9943 | 0.0352 |
| Diseases of the respiratory system | Animal fat | 1.0036 | 0.9973 | 1.0098 | 0.5832 |
| Diseases of the respiratory system | Total sugars | 1.0025 | 1.0002 | 1.0049 | 0.1601 |
| Diseases of the respiratory system | Free sugar | 1.0039 | 1.0011 | 1.0068 | 0.0781 |
| Diseases of the respiratory system | Carbohydrate | 1.0011 | 0.9989 | 1.0032 | 0.6635 |
| Diseases of the respiratory system | Saturated fatty acids | 1.0035 | 0.9919 | 1.0152 | 0.9055 |
| Diseases of the respiratory system | n-3 fatty acids | 0.9850 | 0.8757 | 1.1080 | 0.9630 |
| Diseases of the respiratory system | n-6 fatty acids | 0.9522 | 0.9256 | 0.9797 | 0.0352 |
| Diseases of the respiratory system | Englyst fibre | 0.9924 | 0.9752 | 1.0099 | 0.7212 |
| Diseases of the respiratory system | Calcium | 0.9997 | 0.9993 | 1.0000 | 0.2610 |
| Diseases of the respiratory system | Iron | 0.9869 | 0.9523 | 1.0228 | 0.7983 |
| Diseases of the respiratory system | Vitamin B6 | 0.9907 | 0.8365 | 1.1734 | 0.9630 |
| Diseases of the respiratory system | Vitamin B12 | 1.0017 | 0.9756 | 1.0285 | 0.9630 |
| Diseases of the respiratory system | Folate | 1.0000 | 0.9990 | 1.0011 | 0.9630 |
| Diseases of the respiratory system | Vitamin C | 1.0002 | 0.9989 | 1.0014 | 0.9630 |
| Diseases of the respiratory system | Potassium | 1.0000 | 0.9999 | 1.0001 | 0.9630 |
| Diseases of the respiratory system | Magnesium | 0.9982 | 0.9966 | 0.9998 | 0.1601 |
| Diseases of the respiratory system | Retinol | 1.0000 | 0.9999 | 1.0001 | 0.9630 |
| Diseases of the respiratory system | Total carotene | 1.0000 | 1.0000 | 1.0001 | 0.2610 |
| Diseases of the respiratory system | Vitamin E | 0.9665 | 0.9368 | 0.9972 | 0.1601 |
| Diseases of the respiratory system | Vitamin D | 1.0057 | 0.9753 | 1.0370 | 0.9562 |
| Diseases of the respiratory system | Alcohol | 1.0002 | 0.9969 | 1.0036 | 0.9630 |
| Diseases of the respiratory system | Starch | 0.9983 | 0.9954 | 1.0011 | 0.5631 |
| Diseases of the respiratory system | Monounsaturated fatty acids | 0.9846 | 0.9708 | 0.9985 | 0.1601 |
| Diseases of the respiratory system | Zinc | 0.9949 | 0.9585 | 1.0327 | 0.9630 |
| Diseases of the respiratory system | Thiamin | 1.0042 | 0.8416 | 1.1982 | 0.9630 |
| Diseases of the respiratory system | Riboflavin | 0.9251 | 0.7776 | 1.1005 | 0.7212 |
| Diseases of the respiratory system | Phosphorus | 0.9996 | 0.9992 | 1.0000 | 0.1834 |
| Diseases of the respiratory system | Cholesterol | 0.9999 | 0.9994 | 1.0005 | 0.9630 |
| Diseases of the respiratory system | Alpha-carotene | 1.0001 | 1.0000 | 1.0002 | 0.2523 |
| Diseases of the respiratory system | Beta-carotene | 1.0000 | 1.0000 | 1.0001 | 0.2610 |
| Diseases of the respiratory system | Beta cryptoxanthin | 1.0000 | 0.9997 | 1.0003 | 0.9630 |
| Diseases of the respiratory system | Biotin | 0.9896 | 0.9821 | 0.9972 | 0.0781 |
| Diseases of the respiratory system | Chloride | 0.9999 | 0.9998 | 1.0001 | 0.5832 |
| Diseases of the respiratory system | Copper | 0.7863 | 0.5794 | 1.0670 | 0.3680 |
| Diseases of the respiratory system | Fructose | 1.0013 | 0.9947 | 1.0078 | 0.9562 |
| Diseases of the respiratory system | Glucose | 1.0028 | 0.9953 | 1.0104 | 0.7983 |
| Diseases of the respiratory system | Haem iron | 1.0957 | 0.9320 | 1.2881 | 0.5832 |
| Diseases of the respiratory system | Iodine | 0.9994 | 0.9984 | 1.0004 | 0.5832 |
| Diseases of the respiratory system | Lactose | 0.9983 | 0.9861 | 1.0106 | 0.9630 |
| Diseases of the respiratory system | Maltose | 1.0028 | 0.9876 | 1.0181 | 0.9562 |
| Diseases of the respiratory system | Intrinsic and milk sugars | 0.9992 | 0.9956 | 1.0028 | 0.9562 |
| Diseases of the respiratory system | Manganese | 0.9185 | 0.8492 | 0.9934 | 0.1601 |
| Diseases of the respiratory system | Sodium | 0.9999 | 0.9998 | 1.0001 | 0.7264 |
| Diseases of the respiratory system | Non-haem iron | 0.9810 | 0.9452 | 1.0182 | 0.6361 |
| Diseases of the respiratory system | Niacin equivalent | 0.9980 | 0.9867 | 1.0093 | 0.9562 |
| Diseases of the respiratory system | Non-milk extrinsic sugars | 1.0040 | 1.0011 | 1.0070 | 0.0781 |
| Diseases of the respiratory system | Other Sugars | 1.0080 | 0.9636 | 1.0545 | 0.9562 |
| Diseases of the respiratory system | Pantothenic acid | 0.9982 | 0.9430 | 1.0566 | 0.9630 |
| Diseases of the respiratory system | Selenium | 0.9976 | 0.9931 | 1.0020 | 0.5856 |
| Diseases of the respiratory system | Sucrose | 1.0057 | 1.0016 | 1.0098 | 0.0781 |
| Diseases of the respiratory system | Total nitrogen | 0.9908 | 0.9535 | 1.0296 | 0.9562 |
| Diseases of the respiratory system | Vitamin A retinol equivalents | 1.0000 | 1.0000 | 1.0001 | 0.8776 |
| Diseases of the respiratory system | Trans fatty acids | 1.1498 | 0.9952 | 1.3284 | 0.2292 |
| Diseases of the digestive system | Total weight of all foods and beverages | 1.0002 | 1.0000 | 1.0003 | 0.0665 |
| Diseases of the digestive system | Total weight of beverages only | 1.0004 | 1.0002 | 1.0006 | 2.63E-04 |
| Diseases of the digestive system | Energy | 1.0000 | 1.0000 | 1.0001 | 0.9208 |
| Diseases of the digestive system | Energy from beverages | 1.0004 | 1.0003 | 1.0005 | 3.49E-10 |
| Diseases of the digestive system | Energy density | 1.0079 | 0.9421 | 1.0783 | 0.9208 |
| Diseases of the digestive system | Protein | 0.9918 | 0.9840 | 0.9997 | 0.0753 |
| Diseases of the digestive system | Vegetable protein | 0.9569 | 0.9386 | 0.9756 | 1.26E-04 |
| Diseases of the digestive system | Animal protein | 0.9999 | 0.9932 | 1.0066 | 0.9896 |
| Diseases of the digestive system | Fat | 0.9883 | 0.9792 | 0.9974 | 0.0332 |
| Diseases of the digestive system | Vegetable fat | 0.9781 | 0.9658 | 0.9905 | 0.0029 |
| Diseases of the digestive system | Animal fat | 1.0000 | 0.9912 | 1.0089 | 0.9993 |
| Diseases of the digestive system | Total sugars | 0.9993 | 0.9960 | 1.0027 | 0.8476 |
| Diseases of the digestive system | Free sugar | 1.0036 | 1.0001 | 1.0071 | 0.0823 |
| Diseases of the digestive system | Carbohydrate | 0.9947 | 0.9917 | 0.9976 | 0.0020 |
| Diseases of the digestive system | Saturated fatty acids | 0.9918 | 0.9742 | 1.0097 | 0.4893 |
| Diseases of the digestive system | n-3 fatty acids | 0.7857 | 0.6434 | 0.9595 | 0.0420 |
| Diseases of the digestive system | n-6 fatty acids | 0.9251 | 0.8867 | 0.9652 | 0.0018 |
| Diseases of the digestive system | Englyst fibre | 0.9409 | 0.9171 | 0.9654 | 6.30E-05 |
| Diseases of the digestive system | Calcium | 0.9992 | 0.9986 | 0.9997 | 0.0164 |
| Diseases of the digestive system | Iron | 0.9505 | 0.9011 | 1.0027 | 0.1040 |
| Diseases of the digestive system | Vitamin B6 | 1.0151 | 0.8033 | 1.2828 | 0.9611 |
| Diseases of the digestive system | Vitamin B12 | 0.9679 | 0.9297 | 1.0078 | 0.1786 |
| Diseases of the digestive system | Folate | 0.9981 | 0.9966 | 0.9996 | 0.0359 |
| Diseases of the digestive system | Vitamin C | 0.9999 | 0.9981 | 1.0016 | 0.9413 |
| Diseases of the digestive system | Potassium | 0.9998 | 0.9996 | 0.9999 | 0.0164 |
| Diseases of the digestive system | Magnesium | 0.9961 | 0.9940 | 0.9982 | 0.0018 |
| Diseases of the digestive system | Retinol | 0.9998 | 0.9996 | 1.0000 | 0.0753 |
| Diseases of the digestive system | Total carotene | 0.9999 | 0.9999 | 1.0000 | 0.0266 |
| Diseases of the digestive system | Vitamin E | 0.9467 | 0.9055 | 0.9899 | 0.0389 |
| Diseases of the digestive system | Vitamin D | 0.9793 | 0.9324 | 1.0286 | 0.5191 |
| Diseases of the digestive system | Alcohol | 1.0084 | 1.0059 | 1.0109 | 1.31E-09 |
| Diseases of the digestive system | Starch | 0.9921 | 0.9882 | 0.9961 | 0.0008 |
| Diseases of the digestive system | Monounsaturated fatty acids | 0.9721 | 0.9509 | 0.9938 | 0.0332 |
| Diseases of the digestive system | Zinc | 0.9623 | 0.9126 | 1.0148 | 0.2285 |
| Diseases of the digestive system | Thiamin | 0.7582 | 0.5843 | 0.9838 | 0.0753 |
| Diseases of the digestive system | Riboflavin | 0.7082 | 0.5445 | 0.9213 | 0.0319 |
| Diseases of the digestive system | Phosphorus | 0.9990 | 0.9985 | 0.9996 | 0.0057 |
| Diseases of the digestive system | Cholesterol | 1.0004 | 0.9996 | 1.0011 | 0.5082 |
| Diseases of the digestive system | Alpha-carotene | 0.9998 | 0.9996 | 1.0000 | 0.0753 |
| Diseases of the digestive system | Beta-carotene | 0.9999 | 0.9999 | 1.0000 | 0.0205 |
| Diseases of the digestive system | Beta cryptoxanthin | 0.9998 | 0.9992 | 1.0004 | 0.5502 |
| Diseases of the digestive system | Biotin | 0.9933 | 0.9839 | 1.0029 | 0.2422 |
| Diseases of the digestive system | Chloride | 0.9999 | 0.9998 | 1.0001 | 0.4605 |
| Diseases of the digestive system | Copper | 0.4204 | 0.2782 | 0.6353 | 3.51E-04 |
| Diseases of the digestive system | Fructose | 0.9987 | 0.9888 | 1.0086 | 0.9208 |
| Diseases of the digestive system | Glucose | 1.0011 | 0.9901 | 1.0122 | 0.9359 |
| Diseases of the digestive system | Haem iron | 1.0425 | 0.8439 | 1.2878 | 0.8476 |
| Diseases of the digestive system | Iodine | 1.0000 | 0.9986 | 1.0013 | 0.9896 |
| Diseases of the digestive system | Lactose | 0.9862 | 0.9678 | 1.0051 | 0.2256 |
| Diseases of the digestive system | Maltose | 1.0294 | 1.0133 | 1.0457 | 0.0018 |
| Diseases of the digestive system | Intrinsic and milk sugars | 0.9927 | 0.9870 | 0.9984 | 0.0332 |
| Diseases of the digestive system | Manganese | 0.7837 | 0.7029 | 0.8738 | 1.39E-04 |
| Diseases of the digestive system | Sodium | 1.0000 | 0.9997 | 1.0002 | 0.9208 |
| Diseases of the digestive system | Non-haem iron | 0.9453 | 0.8940 | 0.9995 | 0.0842 |
| Diseases of the digestive system | Niacin equivalent | 0.9823 | 0.9675 | 0.9974 | 0.0493 |
| Diseases of the digestive system | Non-milk extrinsic sugars | 1.0031 | 0.9994 | 1.0068 | 0.1594 |
| Diseases of the digestive system | Other Sugars | 0.9991 | 0.9470 | 1.0540 | 0.9896 |
| Diseases of the digestive system | Pantothenic acid | 0.9039 | 0.8340 | 0.9797 | 0.0359 |
| Diseases of the digestive system | Selenium | 0.9947 | 0.9880 | 1.0014 | 0.1821 |
| Diseases of the digestive system | Sucrose | 0.9962 | 0.9903 | 1.0021 | 0.2849 |
| Diseases of the digestive system | Total nitrogen | 0.9447 | 0.8947 | 0.9975 | 0.0753 |
| Diseases of the digestive system | Vitamin A retinol equivalents | 0.9997 | 0.9995 | 0.9999 | 0.0167 |
| Diseases of the digestive system | Trans fatty acids | 1.2129 | 0.9902 | 1.4857 | 0.1040 |
| Diseases of the musculoskeletal system | Total weight of all foods and beverages | 1.0000 | 0.9997 | 1.0004 | 0.9492 |
| Diseases of the musculoskeletal system | Total weight of beverages only | 1.0000 | 0.9995 | 1.0005 | 0.9764 |
| Diseases of the musculoskeletal system | Energy | 1.0000 | 0.9999 | 1.0001 | 0.9969 |
| Diseases of the musculoskeletal system | Energy from beverages | 1.0000 | 0.9996 | 1.0003 | 0.9575 |
| Diseases of the musculoskeletal system | Energy density | 0.9728 | 0.8126 | 1.1645 | 0.9477 |
| Diseases of the musculoskeletal system | Protein | 1.0013 | 0.9833 | 1.0197 | 0.9624 |
| Diseases of the musculoskeletal system | Vegetable protein | 1.0238 | 0.9829 | 1.0664 | 0.9477 |
| Diseases of the musculoskeletal system | Animal protein | 0.9967 | 0.9782 | 1.0156 | 0.9477 |
| Diseases of the musculoskeletal system | Fat | 1.0071 | 0.9889 | 1.0256 | 0.9477 |
| Diseases of the musculoskeletal system | Vegetable fat | 1.0059 | 0.9850 | 1.0272 | 0.9477 |
| Diseases of the musculoskeletal system | Animal fat | 1.0041 | 0.9821 | 1.0266 | 0.9477 |
| Diseases of the musculoskeletal system | Total sugars | 1.0050 | 0.9973 | 1.0128 | 0.9477 |
| Diseases of the musculoskeletal system | Free sugar | 1.0017 | 0.9901 | 1.0134 | 0.9477 |
| Diseases of the musculoskeletal system | Carbohydrate | 1.0049 | 0.9980 | 1.0119 | 0.9477 |
| Diseases of the musculoskeletal system | Saturated fatty acids | 1.0203 | 0.9811 | 1.0610 | 0.9477 |
| Diseases of the musculoskeletal system | n-3 fatty acids | 0.7892 | 0.5467 | 1.1394 | 0.9477 |
| Diseases of the musculoskeletal system | n-6 fatty acids | 1.0136 | 0.9346 | 1.0994 | 0.9477 |
| Diseases of the musculoskeletal system | Englyst fibre | 1.0355 | 0.9828 | 1.0910 | 0.9477 |
| Diseases of the musculoskeletal system | Calcium | 1.0001 | 0.9990 | 1.0012 | 0.9624 |
| Diseases of the musculoskeletal system | Iron | 1.0143 | 0.8918 | 1.1536 | 0.9492 |
| Diseases of the musculoskeletal system | Vitamin B6 | 1.0452 | 0.6281 | 1.7394 | 0.9575 |
| Diseases of the musculoskeletal system | Vitamin B12 | 0.9761 | 0.9017 | 1.0567 | 0.9477 |
| Diseases of the musculoskeletal system | Folate | 1.0001 | 0.9971 | 1.0030 | 0.9764 |
| Diseases of the musculoskeletal system | Vitamin C | 1.0012 | 0.9982 | 1.0041 | 0.9477 |
| Diseases of the musculoskeletal system | Potassium | 1.0002 | 0.9999 | 1.0005 | 0.9477 |
| Diseases of the musculoskeletal system | Magnesium | 1.0028 | 0.9976 | 1.0081 | 0.9477 |
| Diseases of the musculoskeletal system | Retinol | 0.9997 | 0.9993 | 1.0001 | 0.9477 |
| Diseases of the musculoskeletal system | Total carotene | 1.0000 | 1.0000 | 1.0001 | 0.9477 |
| Diseases of the musculoskeletal system | Vitamin E | 1.0324 | 0.9464 | 1.1262 | 0.9477 |
| Diseases of the musculoskeletal system | Vitamin D | 0.9478 | 0.8600 | 1.0446 | 0.9477 |
| Diseases of the musculoskeletal system | Alcohol | 0.9901 | 0.9762 | 1.0041 | 0.9477 |
| Diseases of the musculoskeletal system | Starch | 1.0011 | 0.9936 | 1.0088 | 0.9477 |
| Diseases of the musculoskeletal system | Monounsaturated fatty acids | 1.0073 | 0.9653 | 1.0510 | 0.9477 |
| Diseases of the musculoskeletal system | Zinc | 1.0402 | 0.9248 | 1.1699 | 0.9477 |
| Diseases of the musculoskeletal system | Thiamin | 1.4176 | 0.9873 | 2.0354 | 0.9477 |
| Diseases of the musculoskeletal system | Riboflavin | 1.1523 | 0.7043 | 1.8853 | 0.9477 |
| Diseases of the musculoskeletal system | Phosphorus | 1.0004 | 0.9992 | 1.0017 | 0.9477 |
| Diseases of the musculoskeletal system | Cholesterol | 1.0004 | 0.9986 | 1.0022 | 0.9477 |
| Diseases of the musculoskeletal system | Alpha-carotene | 0.9999 | 0.9995 | 1.0003 | 0.9477 |
| Diseases of the musculoskeletal system | Beta-carotene | 1.0001 | 1.0000 | 1.0002 | 0.9477 |
| Diseases of the musculoskeletal system | Beta cryptoxanthin | 1.0001 | 0.9998 | 1.0004 | 0.9477 |
| Diseases of the musculoskeletal system | Biotin | 1.0088 | 0.9880 | 1.0300 | 0.9477 |
| Diseases of the musculoskeletal system | Chloride | 1.0002 | 0.9999 | 1.0005 | 0.9477 |
| Diseases of the musculoskeletal system | Copper | 1.1216 | 0.7032 | 1.7889 | 0.9477 |
| Diseases of the musculoskeletal system | Fructose | 1.0136 | 0.9961 | 1.0314 | 0.9477 |
| Diseases of the musculoskeletal system | Glucose | 1.0192 | 0.9969 | 1.0420 | 0.9477 |
| Diseases of the musculoskeletal system | Haem iron | 0.8798 | 0.5130 | 1.5087 | 0.9477 |
| Diseases of the musculoskeletal system | Iodine | 1.0002 | 0.9973 | 1.0030 | 0.9624 |
| Diseases of the musculoskeletal system | Lactose | 1.0259 | 0.9900 | 1.0632 | 0.9477 |
| Diseases of the musculoskeletal system | Maltose | 0.9881 | 0.9303 | 1.0494 | 0.9477 |
| Diseases of the musculoskeletal system | Intrinsic and milk sugars | 1.0094 | 1.0008 | 1.0180 | 0.9477 |
| Diseases of the musculoskeletal system | Manganese | 1.0960 | 0.8309 | 1.4455 | 0.9477 |
| Diseases of the musculoskeletal system | Sodium | 1.0002 | 0.9997 | 1.0007 | 0.9477 |
| Diseases of the musculoskeletal system | Non-haem iron | 1.0196 | 0.8886 | 1.1698 | 0.9477 |
| Diseases of the musculoskeletal system | Niacin equivalent | 0.9920 | 0.9563 | 1.0291 | 0.9477 |
| Diseases of the musculoskeletal system | Non-milk extrinsic sugars | 1.0015 | 0.9887 | 1.0144 | 0.9492 |
| Diseases of the musculoskeletal system | Other Sugars | 0.9485 | 0.8400 | 1.0710 | 0.9477 |
| Diseases of the musculoskeletal system | Pantothenic acid | 1.1551 | 0.9786 | 1.3634 | 0.9477 |
| Diseases of the musculoskeletal system | Selenium | 1.0030 | 0.9903 | 1.0158 | 0.9477 |
| Diseases of the musculoskeletal system | Sucrose | 1.0031 | 0.9904 | 1.0161 | 0.9477 |
| Diseases of the musculoskeletal system | Total nitrogen | 1.0196 | 0.9043 | 1.1497 | 0.9477 |
| Diseases of the musculoskeletal system | Vitamin A retinol equivalents | 0.9999 | 0.9997 | 1.0001 | 0.9477 |
| Diseases of the musculoskeletal system | Trans fatty acids | 1.1199 | 0.7765 | 1.6151 | 0.9477 |
| Diseases of the genitourinary system | Total weight of all foods and beverages | 1.0002 | 0.9998 | 1.0005 | 0.6639 |
| Diseases of the genitourinary system | Total weight of beverages only | 1.0002 | 0.9998 | 1.0006 | 0.6639 |
| Diseases of the genitourinary system | Energy | 0.9999 | 0.9998 | 1.0001 | 0.6639 |
| Diseases of the genitourinary system | Energy from beverages | 0.9999 | 0.9996 | 1.0003 | 0.8496 |
| Diseases of the genitourinary system | Energy density | 0.8497 | 0.7081 | 1.0195 | 0.3591 |
| Diseases of the genitourinary system | Protein | 1.0193 | 1.0044 | 1.0343 | 0.0758 |
| Diseases of the genitourinary system | Vegetable protein | 0.9573 | 0.9067 | 1.0106 | 0.4240 |
| Diseases of the genitourinary system | Animal protein | 1.0220 | 1.0088 | 1.0353 | 0.0158 |
| Diseases of the genitourinary system | Fat | 1.0042 | 0.9862 | 1.0225 | 0.8419 |
| Diseases of the genitourinary system | Vegetable fat | 0.9796 | 0.9454 | 1.0151 | 0.6205 |
| Diseases of the genitourinary system | Animal fat | 1.0169 | 0.9971 | 1.0370 | 0.3977 |
| Diseases of the genitourinary system | Total sugars | 1.0051 | 0.9975 | 1.0127 | 0.5978 |
| Diseases of the genitourinary system | Free sugar | 1.0051 | 0.9952 | 1.0150 | 0.6639 |
| Diseases of the genitourinary system | Carbohydrate | 0.9976 | 0.9891 | 1.0062 | 0.8419 |
| Diseases of the genitourinary system | Saturated fatty acids | 1.0146 | 0.9798 | 1.0507 | 0.6895 |
| Diseases of the genitourinary system | n-3 fatty acids | 1.3499 | 1.0841 | 1.6810 | 0.0578 |
| Diseases of the genitourinary system | n-6 fatty acids | 0.9364 | 0.8420 | 1.0414 | 0.5978 |
| Diseases of the genitourinary system | Englyst fibre | 0.9807 | 0.9159 | 1.0500 | 0.8419 |
| Diseases of the genitourinary system | Calcium | 1.0003 | 0.9990 | 1.0015 | 0.8419 |
| Diseases of the genitourinary system | Iron | 0.9497 | 0.8172 | 1.1036 | 0.7881 |
| Diseases of the genitourinary system | Vitamin B6 | 0.9157 | 0.5290 | 1.5852 | 0.8496 |
| Diseases of the genitourinary system | Vitamin B12 | 1.0727 | 1.0425 | 1.1038 | 3.10E-05 |
| Diseases of the genitourinary system | Folate | 0.9983 | 0.9937 | 1.0029 | 0.7618 |
| Diseases of the genitourinary system | Vitamin C | 1.0022 | 0.9986 | 1.0058 | 0.5978 |
| Diseases of the genitourinary system | Potassium | 1.0002 | 0.9998 | 1.0006 | 0.6639 |
| Diseases of the genitourinary system | Magnesium | 0.9999 | 0.9946 | 1.0052 | 0.9728 |
| Diseases of the genitourinary system | Retinol | 1.0001 | 0.9998 | 1.0003 | 0.8419 |
| Diseases of the genitourinary system | Total carotene | 1.0000 | 0.9999 | 1.0002 | 0.8496 |
| Diseases of the genitourinary system | Vitamin E | 1.0557 | 0.9384 | 1.1875 | 0.6639 |
| Diseases of the genitourinary system | Vitamin D | 1.0896 | 1.0149 | 1.1697 | 0.1127 |
| Diseases of the genitourinary system | Alcohol | 0.9927 | 0.9770 | 1.0087 | 0.6639 |
| Diseases of the genitourinary system | Starch | 0.9893 | 0.9784 | 1.0003 | 0.2950 |
| Diseases of the genitourinary system | Monounsaturated fatty acids | 1.0111 | 0.9633 | 1.0613 | 0.8419 |
| Diseases of the genitourinary system | Zinc | 1.0955 | 0.9812 | 1.2231 | 0.4130 |
| Diseases of the genitourinary system | Thiamin | 0.8825 | 0.4914 | 1.5848 | 0.8496 |
| Diseases of the genitourinary system | Riboflavin | 0.9464 | 0.5090 | 1.7596 | 0.8900 |
| Diseases of the genitourinary system | Phosphorus | 1.0008 | 0.9995 | 1.0020 | 0.5978 |
| Diseases of the genitourinary system | Cholesterol | 1.0003 | 0.9985 | 1.0021 | 0.8496 |
| Diseases of the genitourinary system | Alpha-carotene | 1.0000 | 0.9995 | 1.0006 | 0.9220 |
| Diseases of the genitourinary system | Beta-carotene | 1.0000 | 0.9999 | 1.0002 | 0.8496 |
| Diseases of the genitourinary system | Beta cryptoxanthin | 1.0003 | 0.9999 | 1.0007 | 0.5978 |
| Diseases of the genitourinary system | Biotin | 0.9813 | 0.9524 | 1.0111 | 0.5978 |
| Diseases of the genitourinary system | Chloride | 1.0000 | 0.9997 | 1.0003 | 0.8900 |
| Diseases of the genitourinary system | Copper | 0.8953 | 0.2738 | 2.9279 | 0.8900 |
| Diseases of the genitourinary system | Fructose | 1.0197 | 1.0003 | 1.0395 | 0.2683 |
| Diseases of the genitourinary system | Glucose | 1.0283 | 1.0076 | 1.0494 | 0.0578 |
| Diseases of the genitourinary system | Haem iron | 1.8161 | 1.4923 | 2.2103 | 1.64E-07 |
| Diseases of the genitourinary system | Iodine | 1.0037 | 1.0019 | 1.0055 | 0.0014 |
| Diseases of the genitourinary system | Lactose | 0.9789 | 0.9378 | 1.0217 | 0.6639 |
| Diseases of the genitourinary system | Maltose | 0.9821 | 0.9221 | 1.0459 | 0.8419 |
| Diseases of the genitourinary system | Intrinsic and milk sugars | 1.0048 | 0.9936 | 1.0161 | 0.6871 |
| Diseases of the genitourinary system | Manganese | 0.9331 | 0.7048 | 1.2354 | 0.8419 |
| Diseases of the genitourinary system | Sodium | 1.0000 | 0.9995 | 1.0004 | 0.8900 |
| Diseases of the genitourinary system | Non-haem iron | 0.8992 | 0.7631 | 1.0596 | 0.5978 |
| Diseases of the genitourinary system | Niacin equivalent | 1.0223 | 0.9909 | 1.0546 | 0.5812 |
| Diseases of the genitourinary system | Non-milk extrinsic sugars | 1.0051 | 0.9947 | 1.0156 | 0.6639 |
| Diseases of the genitourinary system | Other Sugars | 1.0287 | 0.9634 | 1.0985 | 0.6871 |
| Diseases of the genitourinary system | Pantothenic acid | 0.9796 | 0.7878 | 1.2180 | 0.8900 |
| Diseases of the genitourinary system | Selenium | 1.0148 | 1.0056 | 1.0241 | 0.0169 |
| Diseases of the genitourinary system | Sucrose | 1.0022 | 0.9884 | 1.0162 | 0.8496 |
| Diseases of the genitourinary system | Total nitrogen | 1.1737 | 1.0637 | 1.2950 | 0.0169 |
| Diseases of the genitourinary system | Vitamin A retinol equivalents | 1.0001 | 0.9998 | 1.0003 | 0.8419 |
| Diseases of the genitourinary system | Trans fatty acids | 1.4504 | 0.9624 | 2.1861 | 0.3591 |

Table S7 Association between regression index and mortality risk by Qgcomp analysis

| quantile | quantile.midpoint | OR | 95% CI | |
| --- | --- | --- | --- | --- |
| 0 | 0.125 | 1.000 | 1.000 | 1.000 |
| 1 | 0.375 | 0.927 | 0.856 | 0.984 |
| 2 | 0.625 | 0.859 | 0.733 | 0.969 |
| 3 | 0.875 | 0.796 | 0.628 | 0.954 |

Table S8 The estimated weights for each nutrient in Qgcomp model

| Nutrient | Weight | Type |
| --- | --- | --- |
| Free sugar | 0.312 | Positive |
| Iron | 0.232 | Positive |
| Englyst fibre | 0.124 | Positive |
| Vitamin E | 0.106 | Positive |
| Maltose | 0.091 | Positive |
| Phosphorus | 0.078 | Positive |
| Potassium | 0.021 | Positive |
| Pantothenic acid | 0.021 | Positive |
| Magnesium | 0.015 | Positive |
| Non-haem iron | 0.175 | Negative |
| Manganese | 0.147 | Negative |
| Biotin | 0.113 | Negative |
| Niacin equivalent | 0.106 | Negative |
| Sucrose | 0.105 | Negative |
| Calcium | 0.080 | Negative |
| Vegetable fat | 0.078 | Negative |
| n-3 fatty acids | 0.072 | Negative |
| n-6 fatty acids | 0.068 | Negative |
| Intrinsic and milk sugars | 0.026 | Negative |
| Non-milk extrinsic sugars | 0.015 | Negative |
| Energy from beverages | 0.015 | Negative |
